# Supplementary material for: COVID-19 Changed Human-Nature Interactions across Green Space Types: Evidence of Change in Multiple Types of Activities from the West Bank, Palestine
Source: MDPI journal article supplement (doi:10.3390/su132413831), 2021-12-14
Supplement: s1 [file s1]

Archive with 3 entries (3 files):
- SupplementalInformation1.pdf
- SupplementalInformation2-3.pdf
- SupplementalInformation4_Tests.xlsx
