# Supplementary material for: COVID-19 Changed Human-Nature Interactions across Green Space Types: Evidence of Change in Multiple Types of Activities from the West Bank, Palestine
Source: MDPI journal article supplement (doi:10.3390/su132413831), 2021-12-14
Supplement: s1 [file s1 › SupplementalInformation1.pdf]

# Human-Nature Interaction of Palestinians in the West Bank before and after the Occurrence of COVID-19 Pandemic

This questionnaire is one of the data collection tools for scientific research carried out by researchers from An-Najah National University and the University of Washington - Seattle - USA. The research explores the differences in the human-nature relation in the West Bank before and after the emergence of the COVID-19 pandemic. Participants must be 18 year old and above.

If you have any comments or inquiries about the content of the questionnaire, you can contact us through the e-mail: [dawwas@najah.edu](mailto:dawwas@najah.edu)

Researchers:

Emad Dawas - An-Najah National University - Nablus - Palestine, and

Karen Dyson - University of Washington - Seattle - United States

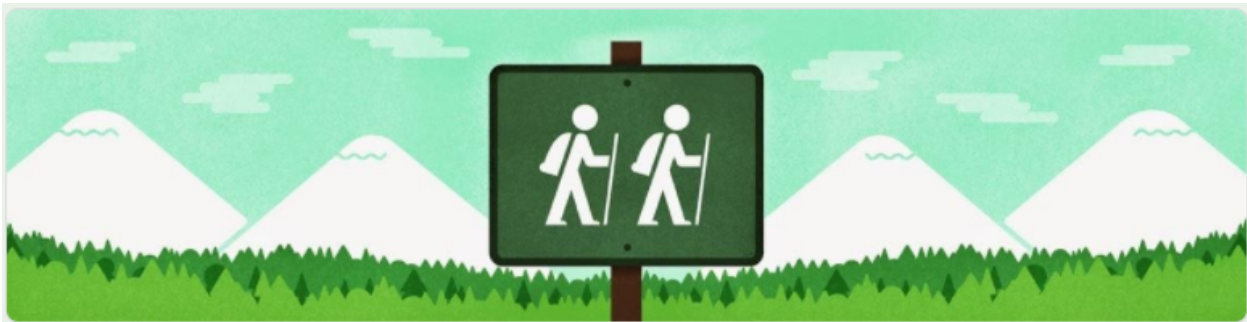

1. Would you like to have a chance for a gift after you complete the questionnaire and submit it. What gift do you prefer: (Select one from below)

*Mark only one oval.*

- ☐ No, I don't want to have a gift      *Skip to question 5*
- ☐ Yes, I prefer to have one Kilogram of organic honey (100% natural)  
*Skip to question 2*
- ☐ Yes, I prefer to have a free recreational tour to the nature of Palestine  
*Skip to question 2*
- ☐ Yes, I prefer to have 100 NIS (about \$30)      *Skip to question 2*

Contact information for those who want to have a chance for a gift:

This part of the questionnaire is for those wishing to participate in the opportunity to receive a gift so that we can deliver the gift to you

2. You full name:

---

3. Place of living:

---

4. Phone number:

---

#### Part I) Personal Questions

5. Gender

*Mark only one oval.*

☐ Male

☐ Female

6. Marital Status

*Mark only one oval.*

☐ Single

☐ Married

☐ Other

7. Age Group

*Mark only one oval.*

☐ Less than 18

☐ 18 - 25

☐ 26 - 35

☐ 36 - 45

☐ 46 - 55

☐ 56 - 65

☐ More than 65

8. Type of housing:

*Mark only one oval.*

☐ Apartment

☐ House

9. Place of Living

*Mark only one oval.*

☐ City

☐ Town

☐ Village

☐ Refugee Camp

10. Select you Governorate

*Mark only one oval.*

- ☐ Jenin
- ☐ Tubas
- ☐ Nablus
- ☐ Tulkarem
- ☐ Qalqulya
- ☐ Salfit
- ☐ Ramallah and Al Bereh
- ☐ Jerusalem
- ☐ Jericho
- ☐ Beathlahem
- ☐ Hebron

11. Select your Employment

*Mark only one oval.*

- ☐ Student
- ☐ Teacher
- ☐ Merchant
- ☐ Farmer
- ☐ Driver
- ☐ Handyman
- ☐ Worker
- ☐ Freelancer
- ☐ Governmental Employee
- ☐ Private Sector Employee
- ☐ Medical Sector Employee
- ☐ NGO Employee
- ☐ Unemployed

12. Place of work:

*Mark only one oval.*

- ☐ Inside the West Bank
- ☐ Inside the Greenline

13. Education

*Mark only one oval.*

- ☐ Highschool or Less
- ☐ Diploma
- ☐ Bachelor
- ☐ Master
- ☐ PhD or more

14. Before the pandemic, my income was:

*Mark only one oval.*

- ☐ Less than 2,000 NIS
- ☐ 2,001 - 4,000 NIS
- ☐ 4,001 - 6,000 NIS
- ☐ 6,001 - 8,000 NIS
- ☐ More than 8,000 NIS
- ☐ I prefer not to answer
- ☐ I have no income

15. After the pandemic, my income:

*Mark only one oval.*

- ☐ Severely decreased
- ☐ Decreased
- ☐ The same
- ☐ Increased
- ☐ Dramatically increased
- ☐ I prefer not to answer
- ☐ I have no income

Part II)  
Gardening

Home garden is the backyard and the area you own surrounding your house that you use for relaxing, planting, gathering and socializing.

16. Do you have a home garden or backyard

*Mark only one oval.*

☐ Yes      *Skip to question 17*

☐ No      *Skip to question 29*

Part II) Gardening

17. Do you spend sometime in your home garden (Relaxing, socializing, working or do any activities):

*Mark only one oval.*

☐ Yes      *Skip to question 19*

☐ No      *Skip to question 18*

Part II) Gardening: Why NOT?

18. Why don't you spend anytime in your home garden or backyard (what is the main reason?):

*Mark only one oval.*

☐ Not one of my interests

☐ Because of the noise

☐ Because of lack of time

☐ Because of lack of privacy

☐ Lockdown and COVID-19 pandemic

☐ My garden is unsuitable for any activity

Part II)  
Gardening:  
Questions

The following questions are about the time you spend in your garden and the type of activities you do while in the garden:

19. You spend time in your home garden:

*Check all that apply.*

|                 | Before the pandemic      | After the pandemic occurred |
|-----------------|--------------------------|-----------------------------|
| Alone           | <input type="checkbox"/> | <input type="checkbox"/>    |
| With the family | <input type="checkbox"/> | <input type="checkbox"/>    |
| With the kids   | <input type="checkbox"/> | <input type="checkbox"/>    |
| With neighbors  | <input type="checkbox"/> | <input type="checkbox"/>    |
| With friends    | <input type="checkbox"/> | <input type="checkbox"/>    |

20. After the occurrence of COVID-19 epidemic, you stay at your home garden for relaxing, picnicking, socializing and gathering with the family and friends:

*Mark only one oval.*

- ☐ Much more often
- ☐ More often
- ☐ About the same
- ☐ Less often
- ☐ Much less
- ☐ I don't do this activity

21. After the occurrence of COVID-19 epidemic, you stay at your home garden for exercising, sporting and walking:

*Mark only one oval.*

- ☐ Much more often
- ☐ More often
- ☐ About the same
- ☐ Less often
- ☐ Much less
- ☐ I don't do this activity

22. After the occurrence of COVID-19, you plant vegetables, legumes plants and crops in your home garden:

*Mark only one oval.*

- ☐ Much more often
- ☐ More often
- ☐ About the same
- ☐ Less often
- ☐ Much less
- ☐ I don't do this activity

23. After the occurrence of COVID-19, you plant and take care of olive trees and other fruitful trees in your home garden:

*Mark only one oval.*

- ☐ Much more often
- ☐ More often
- ☐ About the same
- ☐ Less often
- ☐ Much less
- ☐ I don't do this activity

24. After the occurrence of COVID-19, you plant and take care of ornamental trees and plants in your home garden:

*Mark only one oval.*

- ☐ Much more often
- ☐ More often
- ☐ About the same
- ☐ Less often
- ☐ Much less
- ☐ I don't do this activity

25. After the occurrence of COVID-19, you do landscaping, maintain retaining walls, cut the lawn and plowing in your home garden:

*Mark only one oval.*

- ☐ Much more often
- ☐ More often
- ☐ About the same
- ☐ Less often
- ☐ Much less
- ☐ I don't do this activity

26. After the the occurrence of COVID-19, you take care of livestock and domestic birds in your home garden:

*Mark only one oval.*

- ☐ Much more often
- ☐ More often
- ☐ About the same
- ☐ Less often
- ☐ Much less
- ☐ I don't do this activity

27. After the the occurrence of COVID-19, you do bird feeding/birdwatching and photography in your home garden:

*Mark only one oval.*

- ☐ Much more often
- ☐ More often
- ☐ About the same
- ☐ Less often
- ☐ Much less
- ☐ I don't do this activity

28. After the the occurrence of COVID-19, you search for nests and hunt birds your home garden:

*Mark only one oval.*

- ☐ Much more often
- ☐ More often
- ☐ About the same
- ☐ Less often
- ☐ Much less
- ☐ I don't do this activity

### Part III) Urban Parks and Open/Green Spaces

The urban parks and green/open spaces inside towns and cities, community garden, children's playground, playing field or other recreational areas.

29. Do you visit urban parks and open/green spaces inside cities and towns:

*Mark only one oval.*

- ☐ Yes     *Skip to question 31*
- ☐ No     *Skip to question 30*

### Part III) Urban Parks and Open/Green Spaces: Why NOT?

30. Why don't you visit any urban park or green/open urban spaces. Select the most important reason:

*Mark only one oval.*

- ☐ It is not one of my interests
- ☐ Because of the mess and noise
- ☐ Because of the pandemic and the lockdown
- ☐ Mainly because of lack of time
- ☐ The available parks and green areas are not appropriate for receiving people
- ☐ Mainly because there is no urban park/green/open spaces in my town
- ☐ Mainly for economic reasons

### Part III) Urban Parks and Open/Green Spaces: Questions about Activities

31. You usually go to urban parks/green and open spaces:

*Check all that apply.*

|                 | Before the pandemic      | After the the occurrence of COVID-19 |
|-----------------|--------------------------|--------------------------------------|
| Alone           | <input type="checkbox"/> | <input type="checkbox"/>             |
| With the family | <input type="checkbox"/> | <input type="checkbox"/>             |
| With the kids   | <input type="checkbox"/> | <input type="checkbox"/>             |
| With neighbors  | <input type="checkbox"/> | <input type="checkbox"/>             |
| With friends    | <input type="checkbox"/> | <input type="checkbox"/>             |

32. The mode of transportation you used regularly to go to urban parks and urban green/open spaces was:

*Check all that apply.*

|           | Before the pandemic      | After the the occurrence of COVID-19 |
|-----------|--------------------------|--------------------------------------|
| Walking   | <input type="checkbox"/> | <input type="checkbox"/>             |
| Bicycling | <input type="checkbox"/> | <input type="checkbox"/>             |
| By car    | <input type="checkbox"/> | <input type="checkbox"/>             |
| By bus    | <input type="checkbox"/> | <input type="checkbox"/>             |
| By taxi   | <input type="checkbox"/> | <input type="checkbox"/>             |

33. The distance you cross from your home to your most preferable/visited urban park:

*Check all that apply.*

|                    | Before the pandemic      | After the the occurrence of COVID-19 |
|--------------------|--------------------------|--------------------------------------|
| Less than 0.5 KM   | <input type="checkbox"/> | <input type="checkbox"/>             |
| Between 0.5 - 1 KM | <input type="checkbox"/> | <input type="checkbox"/>             |
| Between 1 - 2 KM   | <input type="checkbox"/> | <input type="checkbox"/>             |
| More than 2 KM     | <input type="checkbox"/> | <input type="checkbox"/>             |

34. After the the occurrence of COVID-19, while visiting urban parks/green/open spaces, you do exercising, sporting, juggling, running activities :

*Mark only one oval.*

- ☐ Much more often
- ☐ More often
- ☐ About the same
- ☐ Less often
- ☐ Much less
- ☐ I don't do this activity

35. After the the occurrence of COVID-19, you go to urban parks and green/open spaces for relaxing, socializing and picnicking:

*Mark only one oval.*

- ☐ Much more often
- ☐ More often
- ☐ About the same
- ☐ Less often
- ☐ Much less
- ☐ I don't do this activity

36. After the the occurrence of COVID-19, you go to urban parks and green/open spaces for birdwatching and photography :

*Mark only one oval.*

- ☐ Much more often
- ☐ More often
- ☐ About the same
- ☐ Less often
- ☐ Much less
- ☐ I don't do this activity

37. After the the occurrence of COVID-19, you go to urban parks and green/open spaces for hunting and nest searching :

*Mark only one oval.*

- ☐ Much more often
- ☐ More often
- ☐ About the same
- ☐ Less often
- ☐ Much less
- ☐ I don't do this activity

#### Part IV) Natural Open Spaces

Natural Open Spaces are open spaces outside and around towns and cities including:

Country parks, woodlands or forests, mountains, hills or moorlands, countryside, farmland, springs and streams.

These areas could be close or far away from your home, and the time spent may range from a few minutes to all day.

38. Do you visit natural open spaces outside or around cities and towns:

*Mark only one oval.*

☐ Yes      *Skip to question 40*

☐ No      *Skip to question 39*

#### Part IV) Natural Open Spaces: Why NOT?

39. Why don't you visit natural open spaces (what is the main reason?):

*Mark only one oval.*

☐ Mainly because it is not one of my interests

☐ Mainly because of the mess and noise

☐ Mainly for the limiting access and lockdown

☐ Mainly because of lack of time

☐ Mainly because of checkpoints and occupation restrictions

☐ Mainly because I feel unsafe and unsecure when being in open nature

☐ Mainly because there is no open natural areas around and near my town

☐ Mainly for economic reasons

#### Part IV) Natural Open Spaces: Activities

40. After the the occurrence of COVID-19, you go to forests and open natural spaces:

*Check all that apply.*

|                 | Before                   | After                    |
|-----------------|--------------------------|--------------------------|
| Alone           | <input type="checkbox"/> | <input type="checkbox"/> |
| With the family | <input type="checkbox"/> | <input type="checkbox"/> |
| With the kids   | <input type="checkbox"/> | <input type="checkbox"/> |
| With neighbors  | <input type="checkbox"/> | <input type="checkbox"/> |
| With friends    | <input type="checkbox"/> | <input type="checkbox"/> |

41. The mode of transportation you used regularly to forests and open natural spaces:

*Check all that apply.*

|           | Before the pandemic      | After the the occurrence of COVID-19, |
|-----------|--------------------------|---------------------------------------|
| Walking   | <input type="checkbox"/> | <input type="checkbox"/>              |
| Bicycling | <input type="checkbox"/> | <input type="checkbox"/>              |
| By car    | <input type="checkbox"/> | <input type="checkbox"/>              |
| By bus    | <input type="checkbox"/> | <input type="checkbox"/>              |
| By taxi   | <input type="checkbox"/> | <input type="checkbox"/>              |

42. The distance you cross from your home to your most preferable/visited urban park:

*Check all that apply.*

|                    | Before the pandemic      | After the the occurrence of COVID-19, |
|--------------------|--------------------------|---------------------------------------|
| Less than 0.5 KM   | <input type="checkbox"/> | <input type="checkbox"/>              |
| Between 0.5 - 1 KM | <input type="checkbox"/> | <input type="checkbox"/>              |
| Between 1 - 2 KM   | <input type="checkbox"/> | <input type="checkbox"/>              |
| Between 2 - 4 KM   | <input type="checkbox"/> | <input type="checkbox"/>              |
| More than 4 KM     | <input type="checkbox"/> | <input type="checkbox"/>              |

43. After the the occurrence of COVID-19, while visiting natural open spaces, you do exercising, sporting, juggling, running activities:

*Mark only one oval.*

- ☐ Much more often
- ☐ More often
- ☐ About the same
- ☐ Less often
- ☐ Much less
- ☐ I don't do this activity

44. After the the occurrence of COVID-19, you visit natural open spaces for relaxing, picnicking and socializing:

*Mark only one oval.*

- ☐ Much more often
- ☐ More often
- ☐ About the same
- ☐ Less often
- ☐ Much less
- ☐ I don't do this activity

45. After the the occurrence of COVID-19, you go to natural open spaces for wildlife and birdwatching and photography :

*Mark only one oval.*

- ☐ Much more often
- ☐ More often
- ☐ About the same
- ☐ Less often
- ☐ Much less
- ☐ I don't do this activity

46. After the the occurrence of COVID-19, you go to natural open spaces for appreciating scenery from your car :

*Mark only one oval.*

- ☐ Much more often
- ☐ More often
- ☐ About the same
- ☐ Less often
- ☐ Much less
- ☐ I don't do this activity

47. After the the occurrence of COVID-19, you go to natural open spaces for hunting and nest searching :

*Mark only one oval.*

- ☐ Much more often
- ☐ More often
- ☐ About the same
- ☐ Less often
- ☐ Much less
- ☐ I don't do this activity

48. After the the occurrence of COVID-19, you go to natural open spaces for gathering wild food and plants:

*Mark only one oval.*

- ☐ Much more often
- ☐ More often
- ☐ About the same
- ☐ Less often
- ☐ Much less
- ☐ I don't do this activity

49. After the the occurrence of COVID-19, you go to natural open spaces for visiting historic and heritage site and exploring new natural sites :

*Mark only one oval.*

- ☐ Much more often
- ☐ More often
- ☐ About the same
- ☐ Less often
- ☐ Much less
- ☐ I don't do this activity

50. After the the occurrence of COVID-19, you go to natural open spaces for camping:

*Mark only one oval.*

- ☐ Much more often
- ☐ More often
- ☐ About the same
- ☐ Less often
- ☐ Much less
- ☐ I don't do this activity

51. After the the occurrence of COVID-19, you go to natural open spaces for plowing and/or landscaping of my private land:

*Mark only one oval.*

- ☐ Much more often
- ☐ More often
- ☐ About the same
- ☐ Less often
- ☐ Much less
- ☐ I don't do this activity

52. After the the occurrence of COVID-19, you go to natural open spaces for crop cultivation and harvesting:

*Mark only one oval.*

- ☐ Much more often
- ☐ More often
- ☐ About the same
- ☐ Less often
- ☐ Much less
- ☐ I don't do this activity

53. After the the occurrence of COVID-19, you go to natural open spaces for planting and taking care of olive trees and other fruitful trees:

*Mark only one oval.*

- ☐ Much more often
- ☐ More often
- ☐ About the same
- ☐ Less often
- ☐ Much less
- ☐ I don't do this activity

54. After the the occurrence of COVID-19, you go to natural open spaces for taking care of livestock, grazing and/or beekeeping:

*Mark only one oval.*

- ☐ Much more often
- ☐ More often
- ☐ About the same
- ☐ Less often
- ☐ Much less
- ☐ I don't do this activity

---

This content is neither created nor endorsed by Google.

Google Forms
