# Supplementary material for: COVID-19 Changed Human-Nature Interactions across Green Space Types: Evidence of Change in Multiple Types of Activities from the West Bank, Palestine
Source: MDPI journal article supplement (doi:10.3390/su132413831), 2021-12-14
Supplement: s1 [file s1 › SupplementalInformation2-3.pdf]

## Supplemental Information 2: Demographic Comparison

The demographic variables of our sample captured from the online survey are listed in detail in Table S2.1. Although the respondents in our sample were limited to those who have internet with Facebook accounts, most of the demographics show high representativeness with marginal deviation from the population. Detailed demographic comments follow:

- More females (54.2%) were involved in the questionnaire than males (49.2%) with 5% deviation from the population percentages (Figure S2.1).
- Almost there are married participants as twice as single participants with 35.7% of singles and 62.3% of married, which is very close to the population percentages.
- As we targeted only adult participants, all respondents less than 18 year old were excluded from the analysis, and the age of our sample was distributed from 18 year old to over 65 years. There is 55% of the sample aged less than 35 year and as we move up the number dropped dramatically to reach only 1.5% for participants over 65 year old. This distribution, in fact, is very reflective to the Palestinian population as a youth population. Age-sex distribution in Figure S2.1 shows high alignment between the sample and the population. The only exception is the base of the pyramid, where females outnumber males in the first age group and skew the pyramid base to the left.

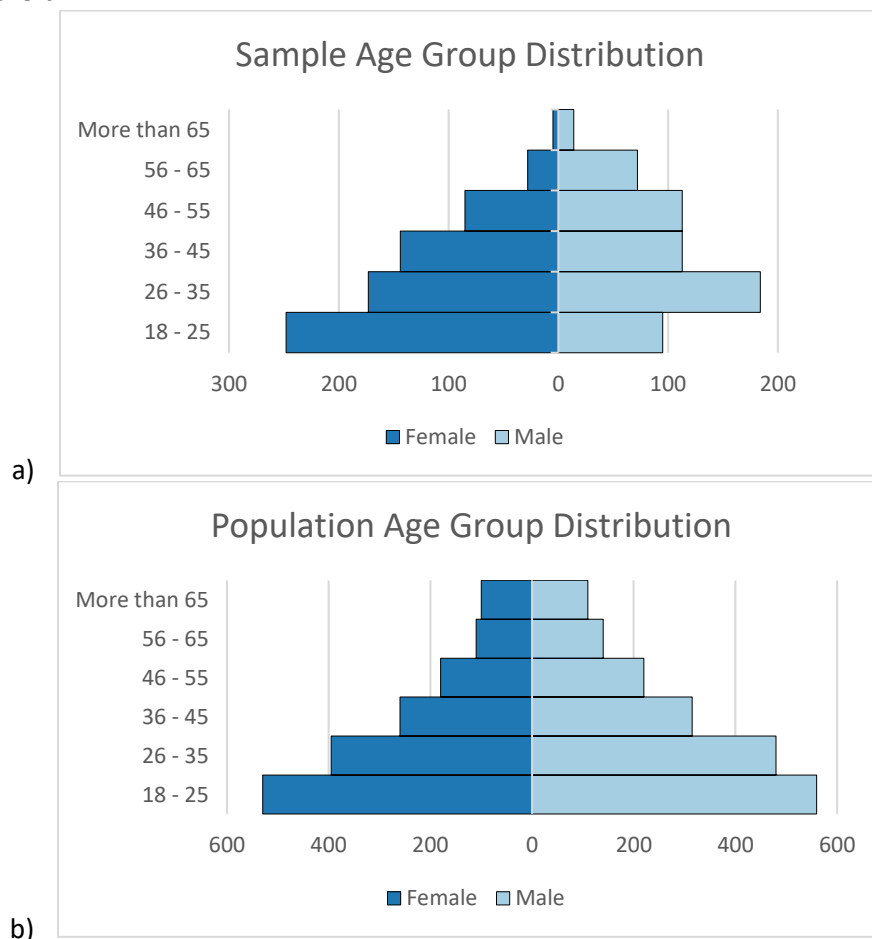

**Figure S2.1.** Comparison of age group distribution for (a) our sample and (b) the population of Palestine.

- As to the housing type, 64% of the participants live in houses while 36% live in apartments. This is very close with the population housing type with 4% deviation.
- To classify participants by geographic location, we asked them two questions about whether they live in urban areas, rural areas and refugee camps and about the governorate where they live. In order to prevent any confusion from the participants about urban and rural terms, we gave them two choices: cities and towns instead of urban areas and villages instead of rural areas. More than two thirds of the participants live in urban areas , 49.7% in cities and 20.6% in towns. The rest of the participants live in rural areas (villages) and refugee camps with 26.1%, and 3.6%, respectively. These percentages are highly consistent with the population, with differences ranging from -1.4% in the refugee camps residents to 0.7% in the urban areas residents.
- The spatial distribution of the sample on the governorate basis and its comparison with the population distribution is presented in Figure S2.2. Four governorates have less percentage than the population including Jerusalem as the highest difference with 5%, and Jericho with the least difference with 2%. The rest of the governorates, on the other hand, have higher percentages than the population with maximum of 2.5% for Tulkarm and the minimum percentage of less than 1% in Bethlehem.

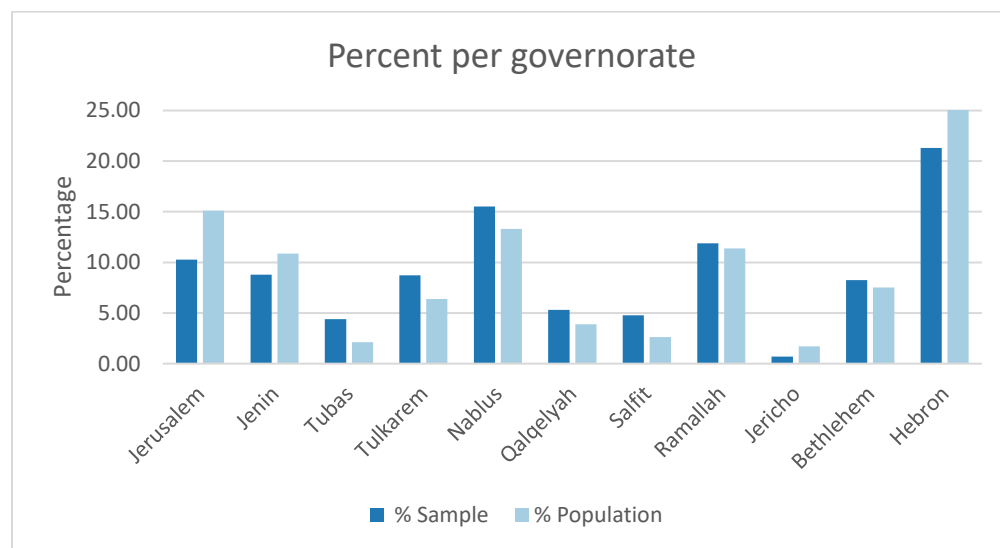

**Figure 4.** Comparison of the percent of our sample in each Governorate and the percentage of the population of the West Bank in each Governorate.

- Employment and unemployment rates for the sample are 77% and 23%, respectively. These figures are also highly consistent with characteristics of the West Bank population.
- 90.1% of the sample participants are working inside the West Bank while 9.9% work inside the Greenline, which deviates in almost 3% from the population percentages.

- Our sample is highly educated as 83.1% of the participants have at least one degree after high school of which 58% have a bachelor's degree. Unfortunately, we did not find this piece of information for the population of the study area.
- The monthly income group with the most frequency was the second group 2001 – 4000 NIS (\$588 - \$1176) and the least one was the last group with more than 8,000 NIS (\$2,352).

| Demographic                    | Variable  |              | Responses | % Sample |      | % West Bank<br>(Study Pop'n) |
|--------------------------------|-----------|--------------|-----------|----------|------|------------------------------|
| Gender                         | Male      |              | 591       | 46.4     |      | 50.8                         |
|                                | Female    |              | 683       | 53.6     |      | 49.2                         |
| Marital status                 | Single    |              | 436       | 34.2     |      | 35.3                         |
|                                | Married   |              | 814       | 63.9     |      | 60.8                         |
|                                | Other     |              | 24        | 1.9      |      | 4.9                          |
| Age group                      | 18-25     |              | 344       | 26.9     |      | 32.1                         |
|                                | 26-35     |              | 358       | 28.0     |      | 25.7                         |
|                                | 36-45     |              | 258       | 20.2     |      | 16.9                         |
|                                | 46-55     |              | 198       | 15.5     |      | 11.8                         |
|                                | 56-65     |              | 101       | 7.8      |      | 7.4                          |
|                                | Over 65   |              | 19        | 1.5      |      | 6.2                          |
| Housing type                   | Apartment |              | 456       | 35.7     |      | 40.0                         |
|                                | House     |              | 820       | 64.3     |      | 60.0                         |
| Place of living                | Urban     | City         | 636       | 49.9     | 70.4 | 71.0                         |
|                                |           | Town         | 262       | 20.5     |      |                              |
|                                | Rural     | Village      | 333       | 26.1     |      | 24.0                         |
|                                |           | Refugee camp |           | 44       | 3.5  |                              |
| Distribution by<br>governorate | Jerusalem |              | 126       | 10.0     |      | 15.1                         |
|                                | Jenin     |              | 111       | 8.8      |      | 10.9                         |
|                                | Tubas     |              | 53        | 4.2      |      | 2.1                          |
|                                | Tulkarem  |              | 112       | 8.9      |      | 6.4                          |
|                                | Nablus    |              | 197       | 15.6     |      | 13.3                         |

|                                                                                       |                        |     |                                |      |
|---------------------------------------------------------------------------------------|------------------------|-----|--------------------------------|------|
| Employment<br><i>For comparison, 214 students were excluded from the calculations</i> | Qalqelyah              | 68  | 5.4                            | 3.9  |
|                                                                                       | Salfit                 | 61  | 4.8                            | 2.6  |
|                                                                                       | Ramallah               | 154 | 12.0                           | 11.4 |
|                                                                                       | Jericho                | 9   | 0.7                            | 1.7  |
|                                                                                       | Bethlehem              | 102 | 8.1                            | 7.5  |
|                                                                                       | Hebron                 | 272 | 21.6                           | 25.1 |
|                                                                                       | Employed               | 795 | 76.1                           | 74.0 |
| Work location                                                                         | Unemployed             | 238 | 23.9                           | 26.0 |
|                                                                                       | Inside the West Bank   | 927 | 90.0                           | 86.9 |
|                                                                                       | Inside the Greenline   | 103 | 10.0                           | 13.1 |
| Education                                                                             | High School or Less    | 187 | 14.7                           | ---  |
|                                                                                       | Bachelor               | 755 | 59.5                           | ---  |
|                                                                                       | Diploma                | 115 | 9.1                            | ---  |
|                                                                                       | Masters or more        | 212 | 16.7                           | ---  |
| Income before<br>COVID-19                                                             | Less than 2000 NIS     | 136 | 11.8                           | 14.0 |
|                                                                                       | 2001-4000 NIS          | 375 | 32.4                           | ---  |
|                                                                                       | 4001-6000 NIS          | 196 | 17.0                           | ---  |
|                                                                                       | 6001-8000 NIS          | 64  | 5.5                            | ---  |
|                                                                                       | More than 8,000 NIS    | 59  | 5.1                            | ---  |
|                                                                                       | I have no Income       | 326 | 28.2                           | ---  |
|                                                                                       | I prefer not to answer | 104 | <i>Excluded for comparison</i> |      |

\*Source: Official website of the Palestinian Central Bureau of Statistics (PCBS)

## Supplemental Information 3: Detailed Results

### Gardens

#### Do you have a garden?

- 712 Have gardens
- 566 Do not have gardens

#### Of respondents that have a garden, do you spend time in the garden?

- 632 Yes
- 79 No

#### Why don't people spend time in the garden?

- 17 Because of lack of privacy
- 29 Because of lack of time
- 7 Because of the noise
- 10 My garden is unsuitable for any activity
- 16 Not one of my interests

#### Who do respondents spend time with in their gardens?

|                             | Alone | Family | Friends  | Kids   | Neighbors |
|-----------------------------|-------|--------|----------|--------|-----------|
| After the pandemic occurred | 222   | 451    | 141      | 220    | 113       |
| Before the pandemic         | 205   | 467    | 281      | 275    | 228       |
| X-squared                   | 0.677 | 0.279  | 46.4     | 6.11   | 38.8      |
| p-value                     | 0.411 | 0.597  | 9.42E-12 | 0.0134 | 4.74E-10  |
| Corrected p-value           | 0.821 | 0.821  | 4.71E-11 | 0.0403 | 1.89E-09  |

## Who do respondents spend time with in their garden?

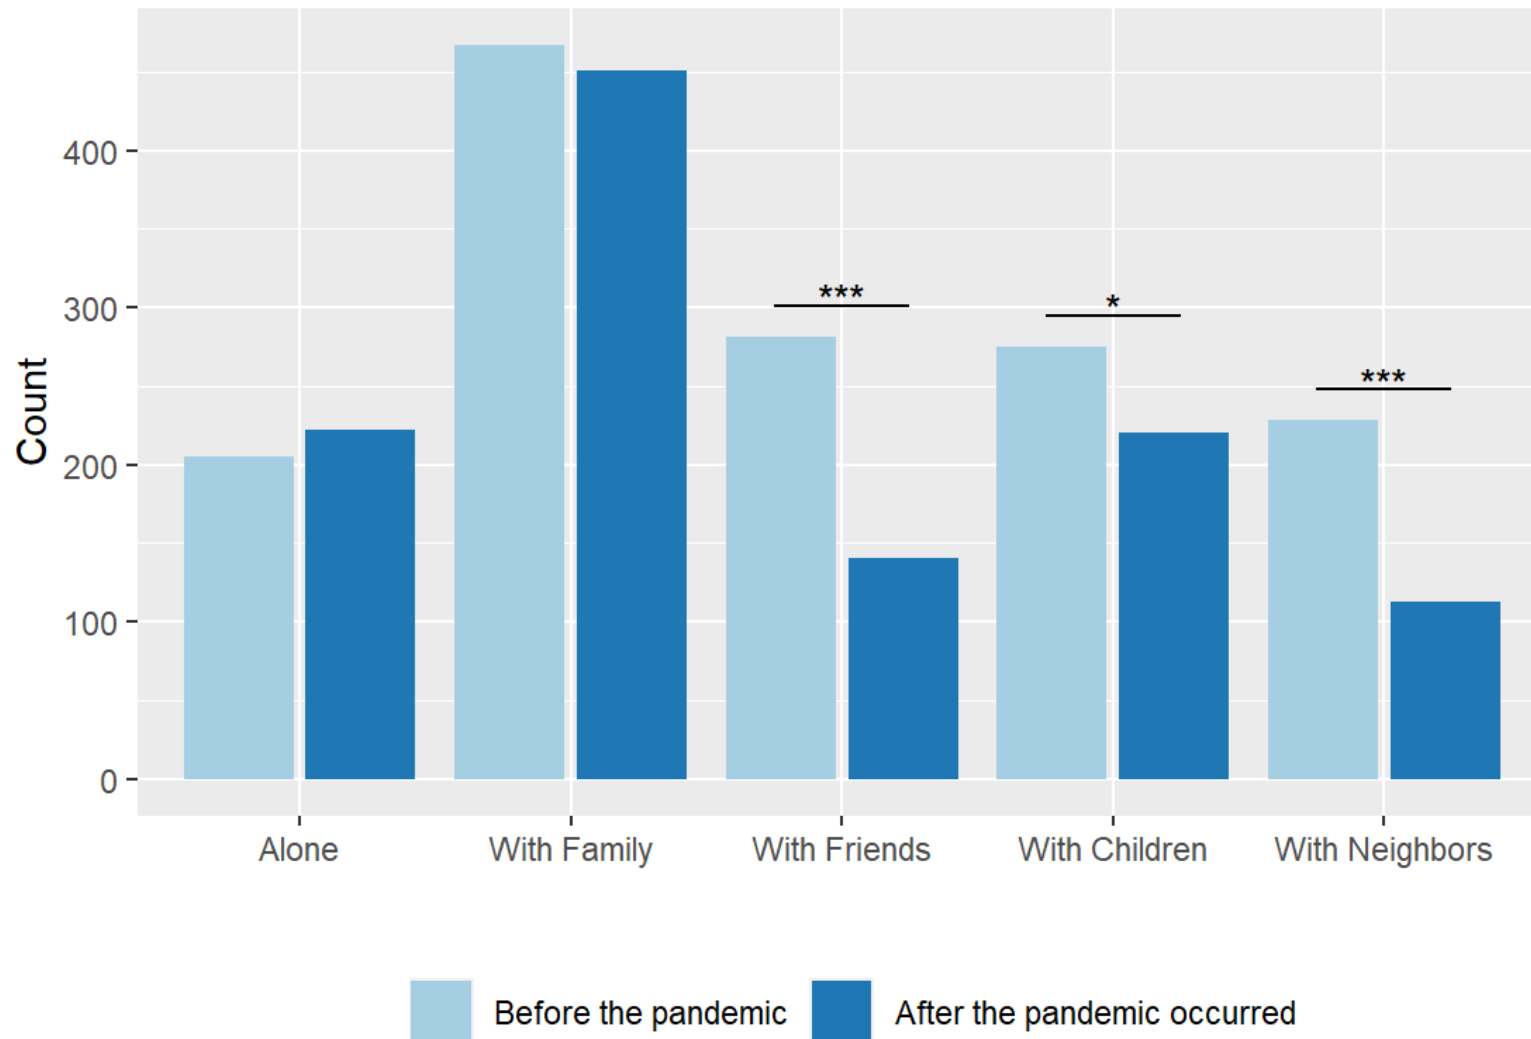

What activities do respondents engage in; what is the relative frequency after covid 19 compared with before?

|                             | Birding and<br>Photography | Exercising | Bird nest & other<br>Harvesting | Gardening | Landscaping | Livestock | Ornamentals | Relaxing |
|-----------------------------|----------------------------|------------|---------------------------------|-----------|-------------|-----------|-------------|----------|
| Much less                   | 24                         | 42         | 12                              | 28        | 20          | 15        | 28          | 43       |
| Less often                  | 23                         | 66         | 8                               | 36        | 34          | 11        | 32          | 84       |
| About the same              | 145                        | 145        | 37                              | 145       | 159         | 67        | 174         | 169      |
| More often                  | 144                        | 149        | 17                              | 167       | 177         | 69        | 169         | 179      |
| Much more often             | 102                        | 82         | 11                              | 113       | 125         | 48        | 140         | 125      |
| I don't do this<br>activity | 190                        | 148        | 546                             | 142       | 117         | 419       | 87          | 30       |

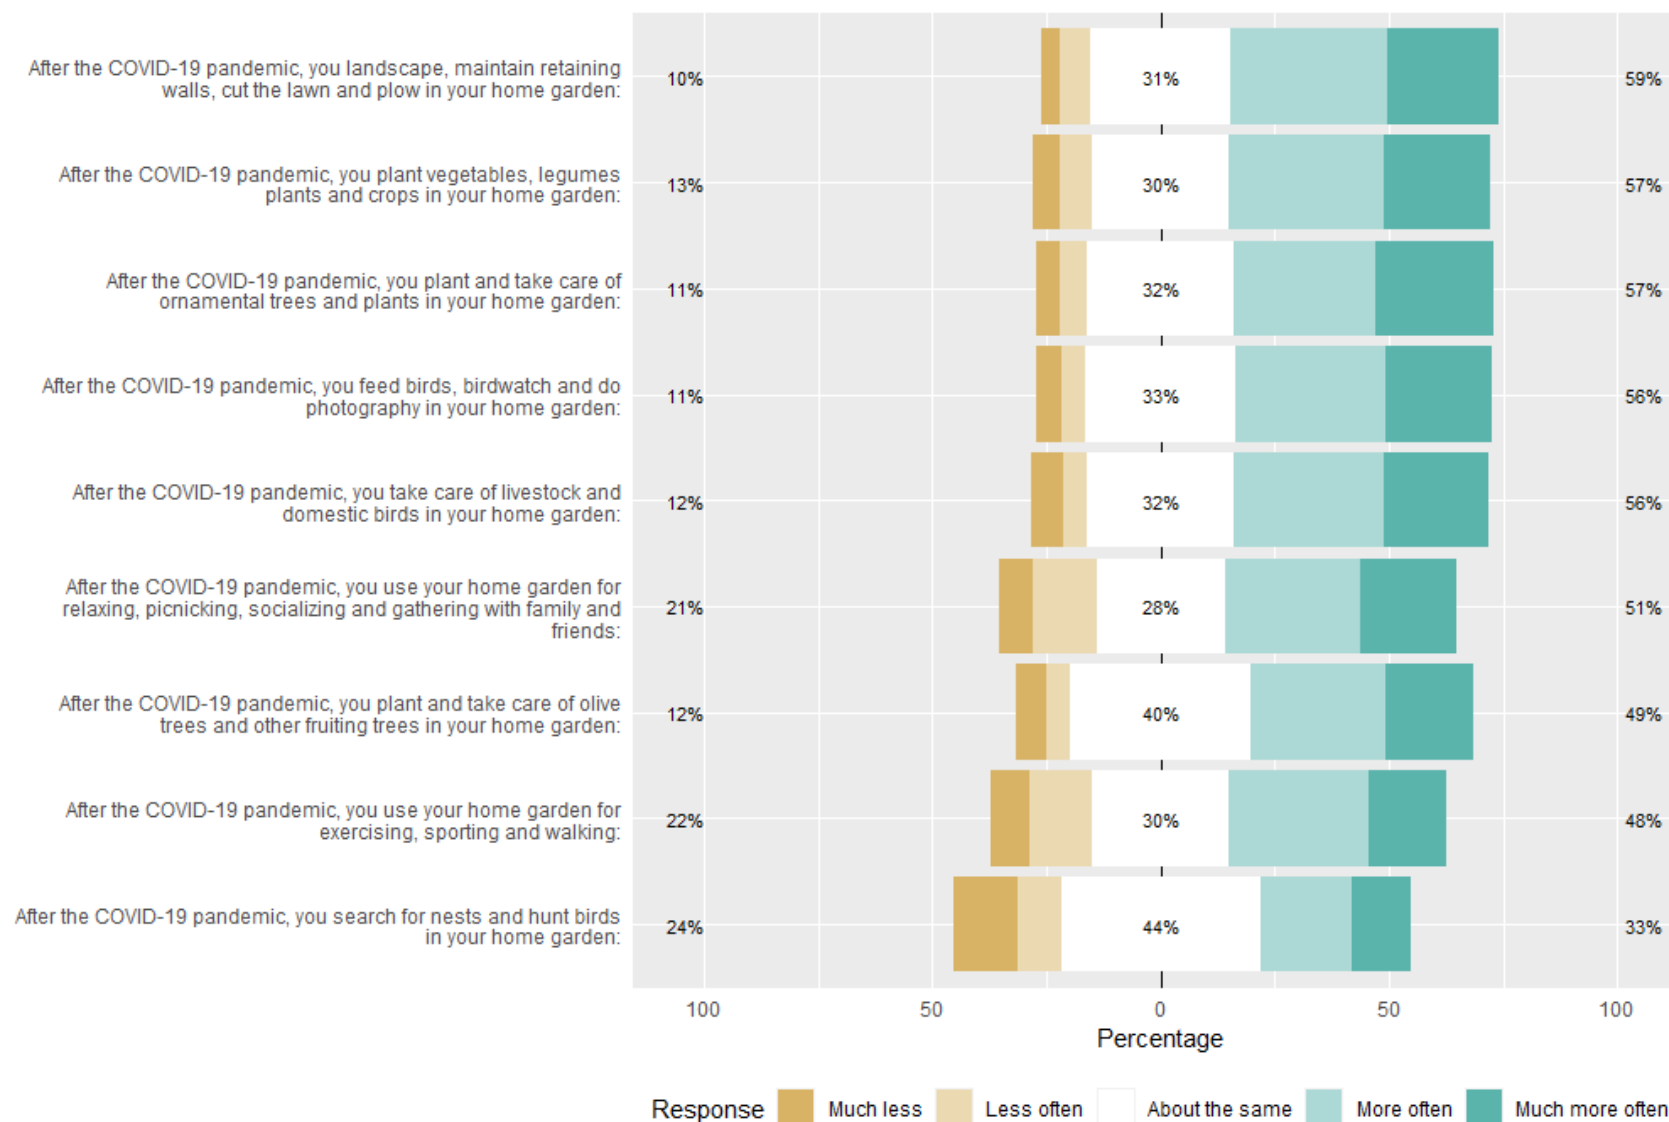

## Do respondents do activities more or less often after the pandemic?

Do respondents perform activities in gardens less or more often after the Covid19 pandemic?

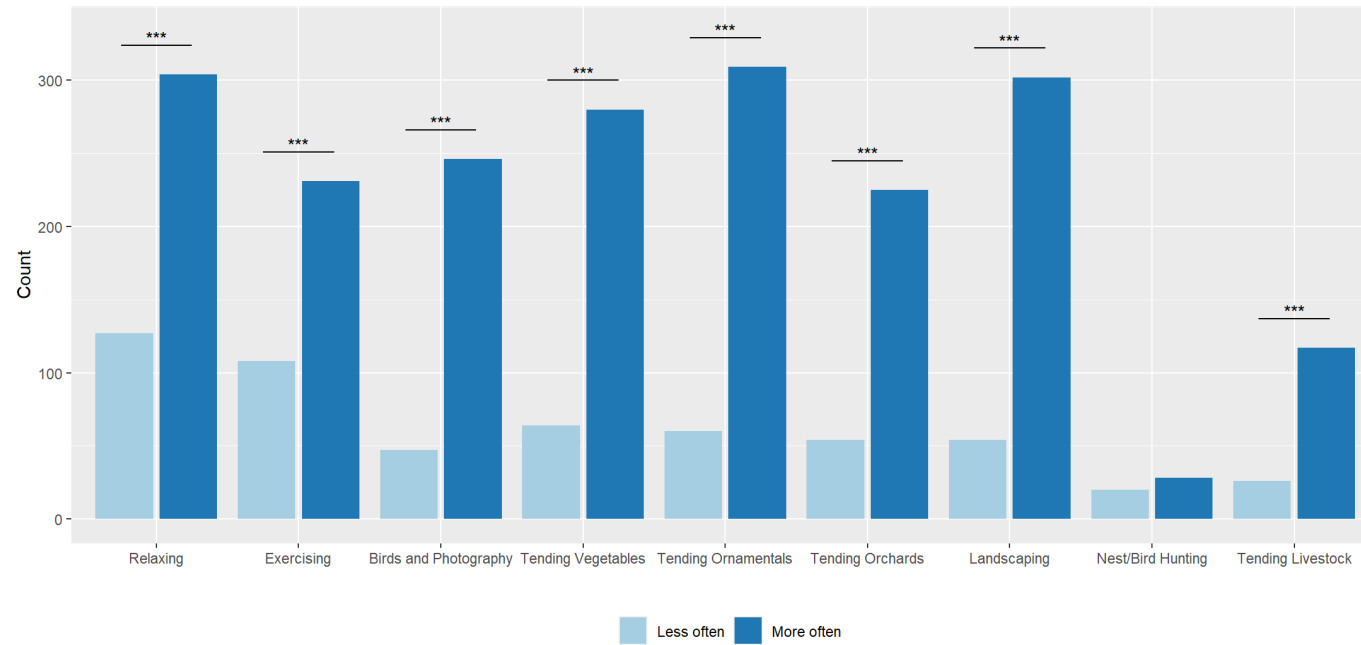

## Urban Parks (Public Greenspace)

### Do you visit Urban Parks?

- 737 Yes
- 541 No

### For those who do NOT visit urban parks, why do you not visit?

- 131 Because of lack of time
- 45 Because of the noise
- 79 Lockdown and COVID-19 pandemic
- 136 Mainly because there is no urban park/green/open spaces in my town
- 68 Mainly for economic reasons
- 38 Not one of my interests
- 42 The available parks and green areas are not appropriate for receiving people.
- 2 non-response

### For those who DO visit urban parks, who do respondents spend time with in urban parks?

|                             | Alone       | Family  | Friends  | Kids     | Neighbors |
|-----------------------------|-------------|---------|----------|----------|-----------|
| Before the pandemic         | 143         | 538     | 450      | 299      | 220       |
| After the pandemic occurred | 247         | 453     | 289      | 222      | 79        |
| X-squared                   | 27.7        | 7.29    | 35.1     | 11.4     | 66.5      |
| p-value                     | 0.000000139 | 0.00693 | 3.17E-09 | 0.000742 | 3.51E-16  |
| Corrected p-value           | 0.000000418 | 0.00693 | 1.27E-08 | 0.00148  | 1.76E-15  |

## Who do respondents spend time with in urban parks?

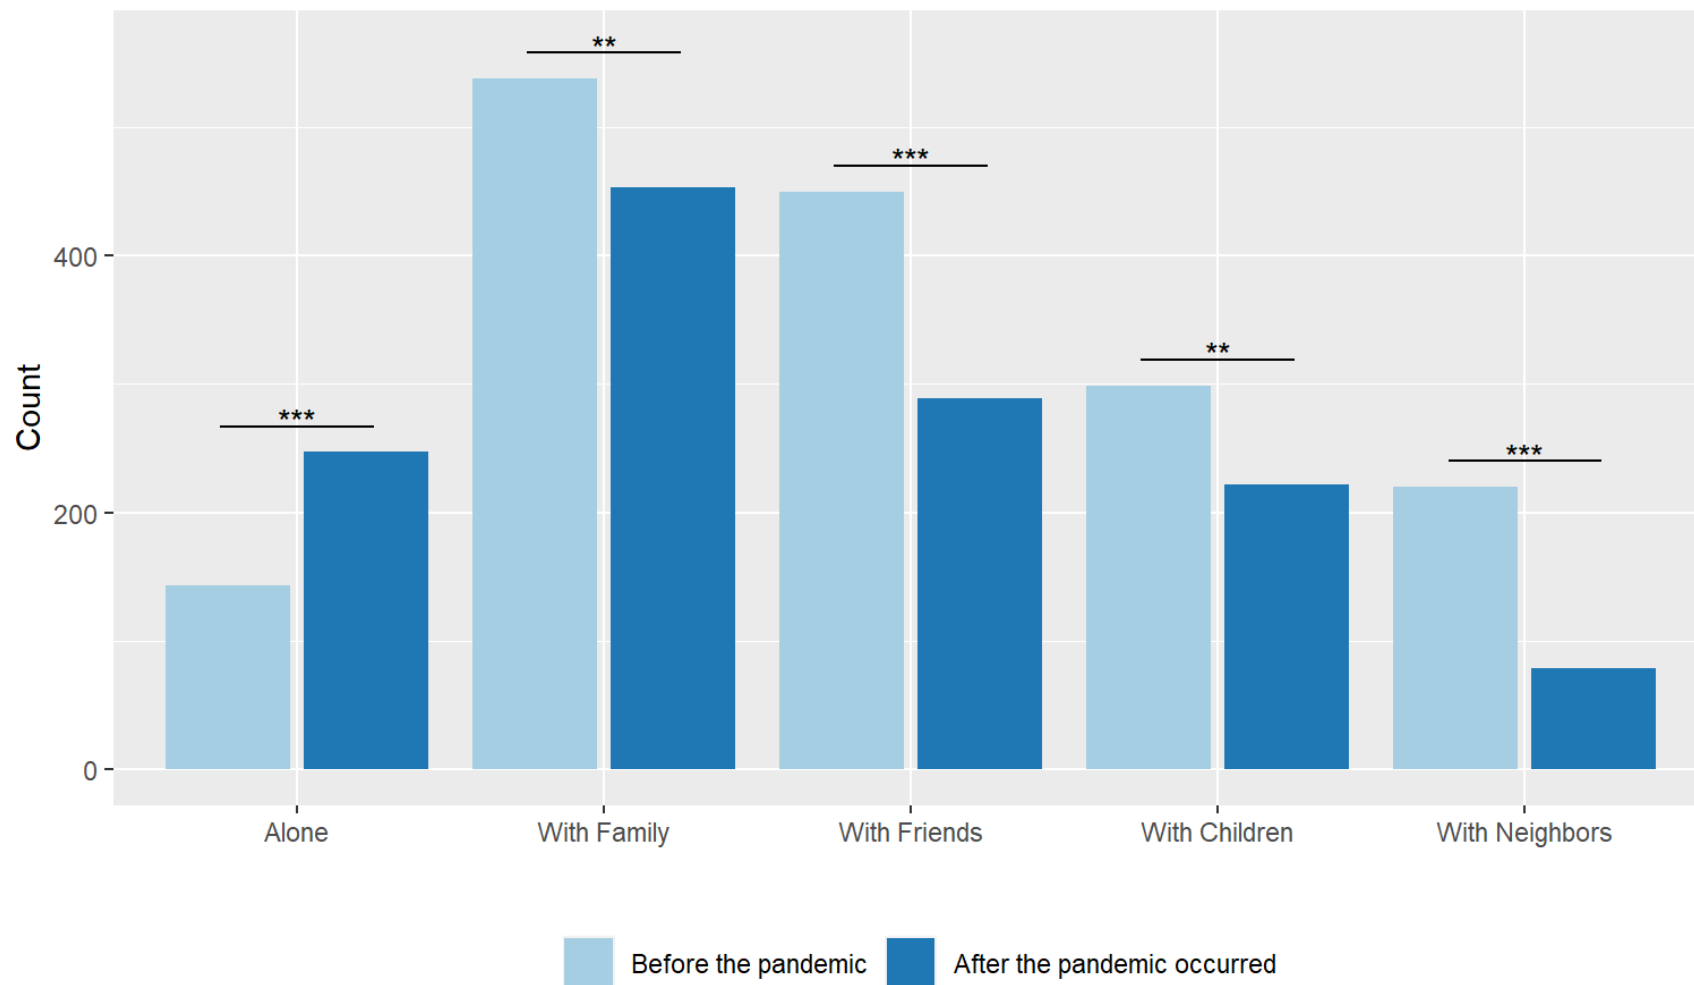

## How do respondents travel to urban parks?

|                     | Bicycling | Bus       | Car   | Taxi    | Walking |
|---------------------|-----------|-----------|-------|---------|---------|
| Before the pandemic | 53        | 126       | 489   | 162     | 317     |
| After the pandemic  | 45        | 70        | 443   | 113     | 335     |
| X-squared           | 0.653     | 16        | 2.27  | 8.73    | 0.497   |
| p-value             | 0.419     | 0.0000633 | 0.132 | 0.00313 | 0.481   |
| Corrected p-value   | 0.838     | 0.000317  | 0.396 | 0.0125  | 0.838   |

How do respondents travel to urban parks?

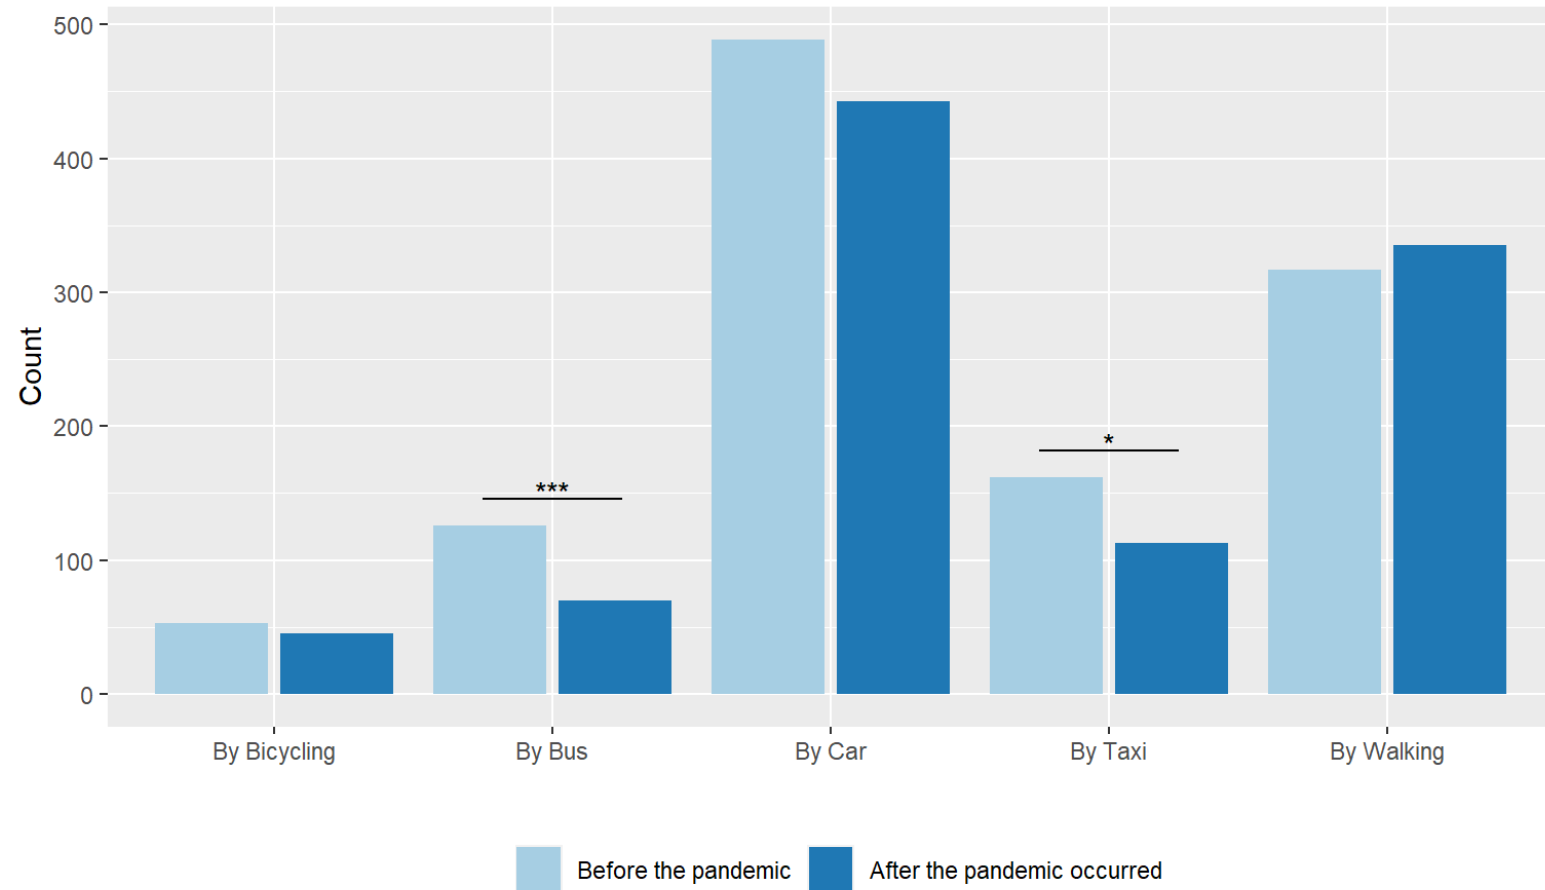

How far do respondents travel to urban parks?

|                     | Under 0.5 km | 0.5 to 1 km | 1 to 2 km | Over 2 km |
|---------------------|--------------|-------------|-----------|-----------|
| Before the pandemic | 148          | 159         | 186       | 335       |
| After the pandemic  | 115          | 151         | 160       | 291       |
| X-squared           | 4.14         | 0.206       | 1.95      | 3.09      |
| p-value             | 0.0419       | 0.65        | 0.162     | 0.0786    |
| Corrected p-value   | 0.167        | 0.65        | 0.324     | 0.236     |

Have respondents changed the activities they do in urban parks?

|                 | Relaxing | Exercise | Birds and Photography | Harvesting |
|-----------------|----------|----------|-----------------------|------------|
| Much less       | 125      | 64       | 88                    | 36         |
| Less often      | 187      | 107      | 97                    | 30         |
| About the same  | 168      | 162      | 136                   | 47         |
| More often      | 128      | 112      | 94                    | 18         |
| Much more often | 87       | 87       | 67                    | 14         |

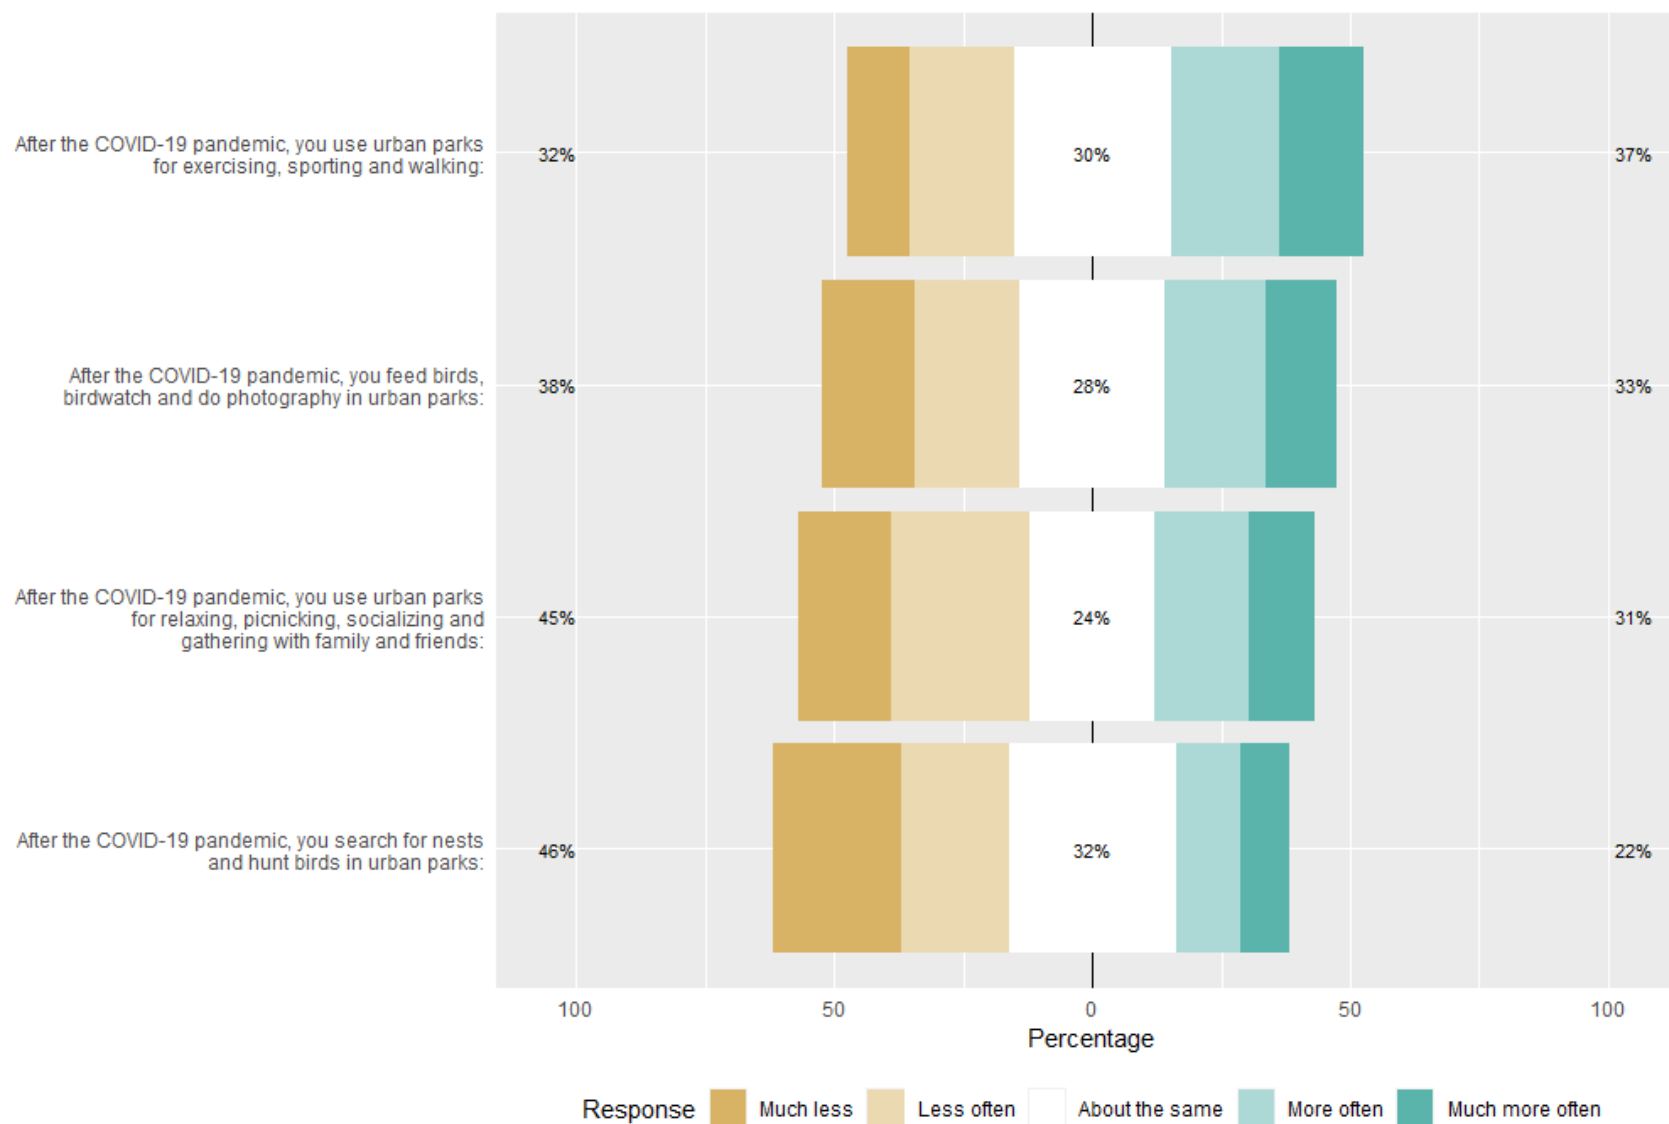

## Do respondents do activities more or less after the pandemic?

Do respondents perform activities in urban parks less or more often after the Covid19 pandemic?

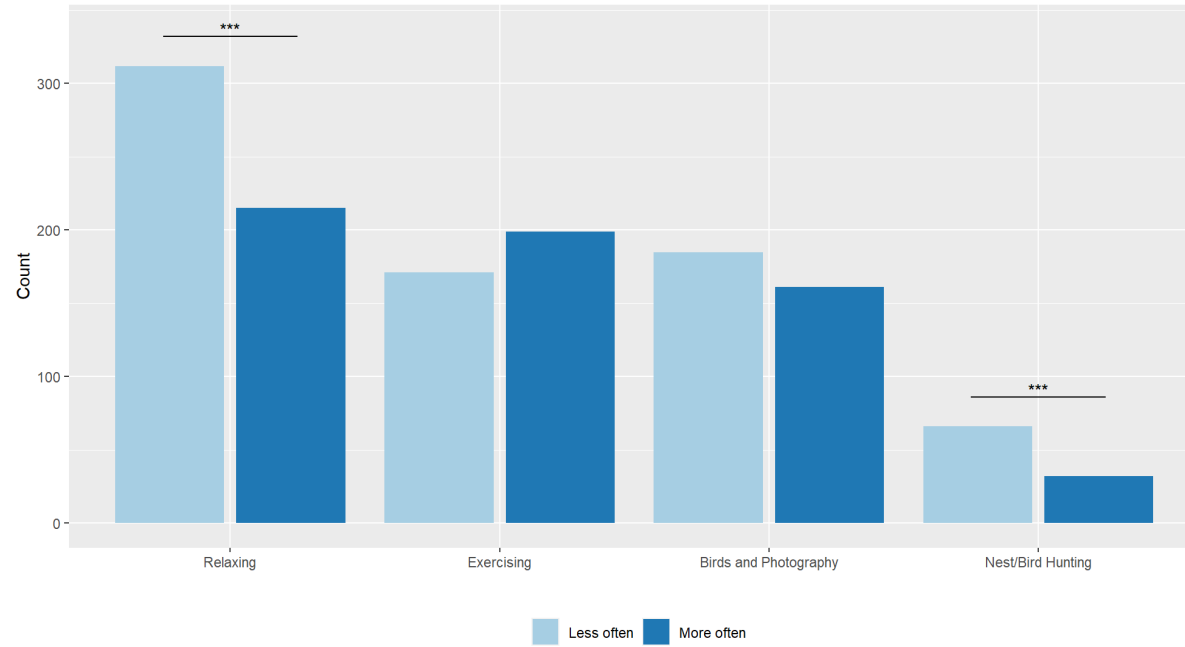

## Natural Areas

How many people visit natural areas?

- 959 Yes
- 318 No

Why don't people visit natural areas?

- 70 Because of lack of time
- 10 Because of the noise
- 34 Lockdown and the COVID-19 pandemic
- 13 Mainly because I feel unsafe and unsecure when being in open nature
- 36 Mainly because of checkpoints and occupation restrictions
- 96 Mainly because there are no open natural areas around and near my town
- 33 Mainly for economic reasons
- 25 Not one of my interests
- 961 non-responses (959 of these are people who do visit natural areas)

For those that do visit natural areas, who do you visit with?

|                             | Alone    | Family  | Friends      | Kids    | Neighbors    |
|-----------------------------|----------|---------|--------------|---------|--------------|
| Before the pandemic         | 159      | 697     | 528          | 306     | 204          |
| After the pandemic occurred | 226      | 597     | 361          | 243     | 98           |
| X-squared                   | 11.7     | 7.73    | 31.40        | 7.23    | 37           |
| p-value                     | 0.000639 | 0.00544 | 0.0000000213 | 0.00717 | 0.0000000011 |
| Corrected p-value           | 0.00192  | 0.0109  | 0.0000000852 | 0.0109  | 0.0000000053 |

### Who do respondents spend time with in natural areas?

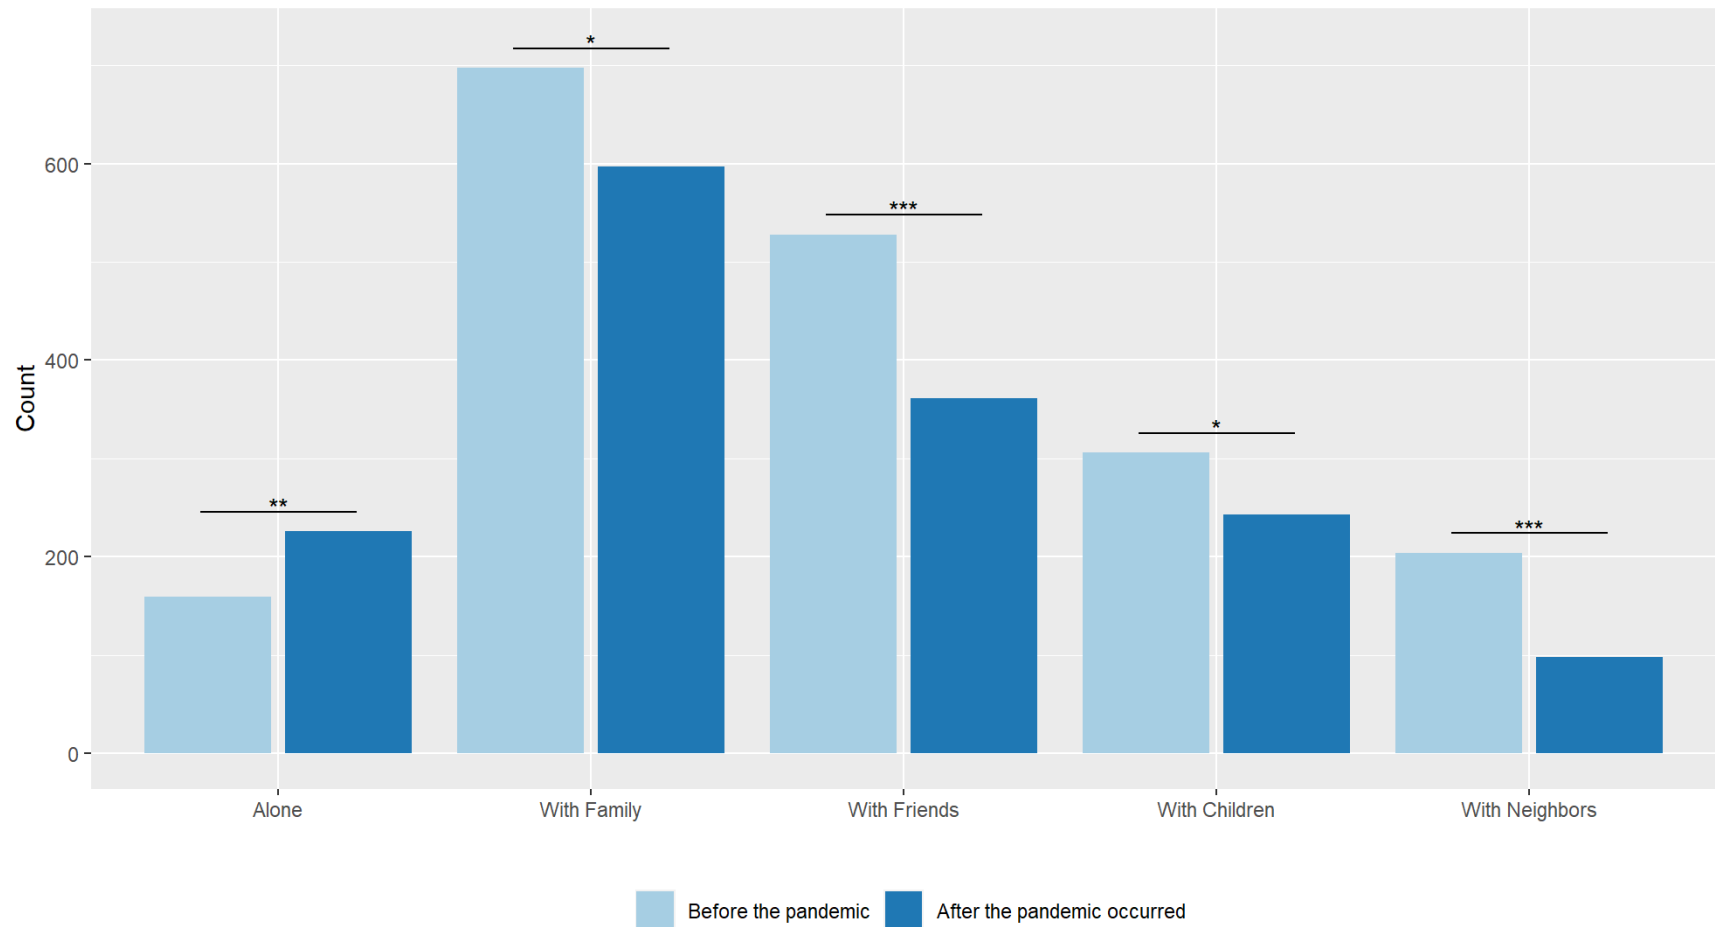

### How do respondents travel to natural areas?

|                             | Bicycling | Bus      | Car    | Taxi      | Walking |
|-----------------------------|-----------|----------|--------|-----------|---------|
| Before the pandemic         | 53        | 159      | 644    | 164       | 395     |
| After the pandemic occurred | 51        | 101      | 583    | 98        | 368     |
| X-squared                   | 0.0385    | 12.9     | 3.03   | 16.6      | 0.955   |
| p-value                     | 0.845     | 0.000322 | 0.0816 | 0.0000455 | 0.328   |
| Corrected p-value           | 0.845     | 0.00129  | 0.245  | 0.000228  | 0.657   |

How do respondents travel to natural areas?

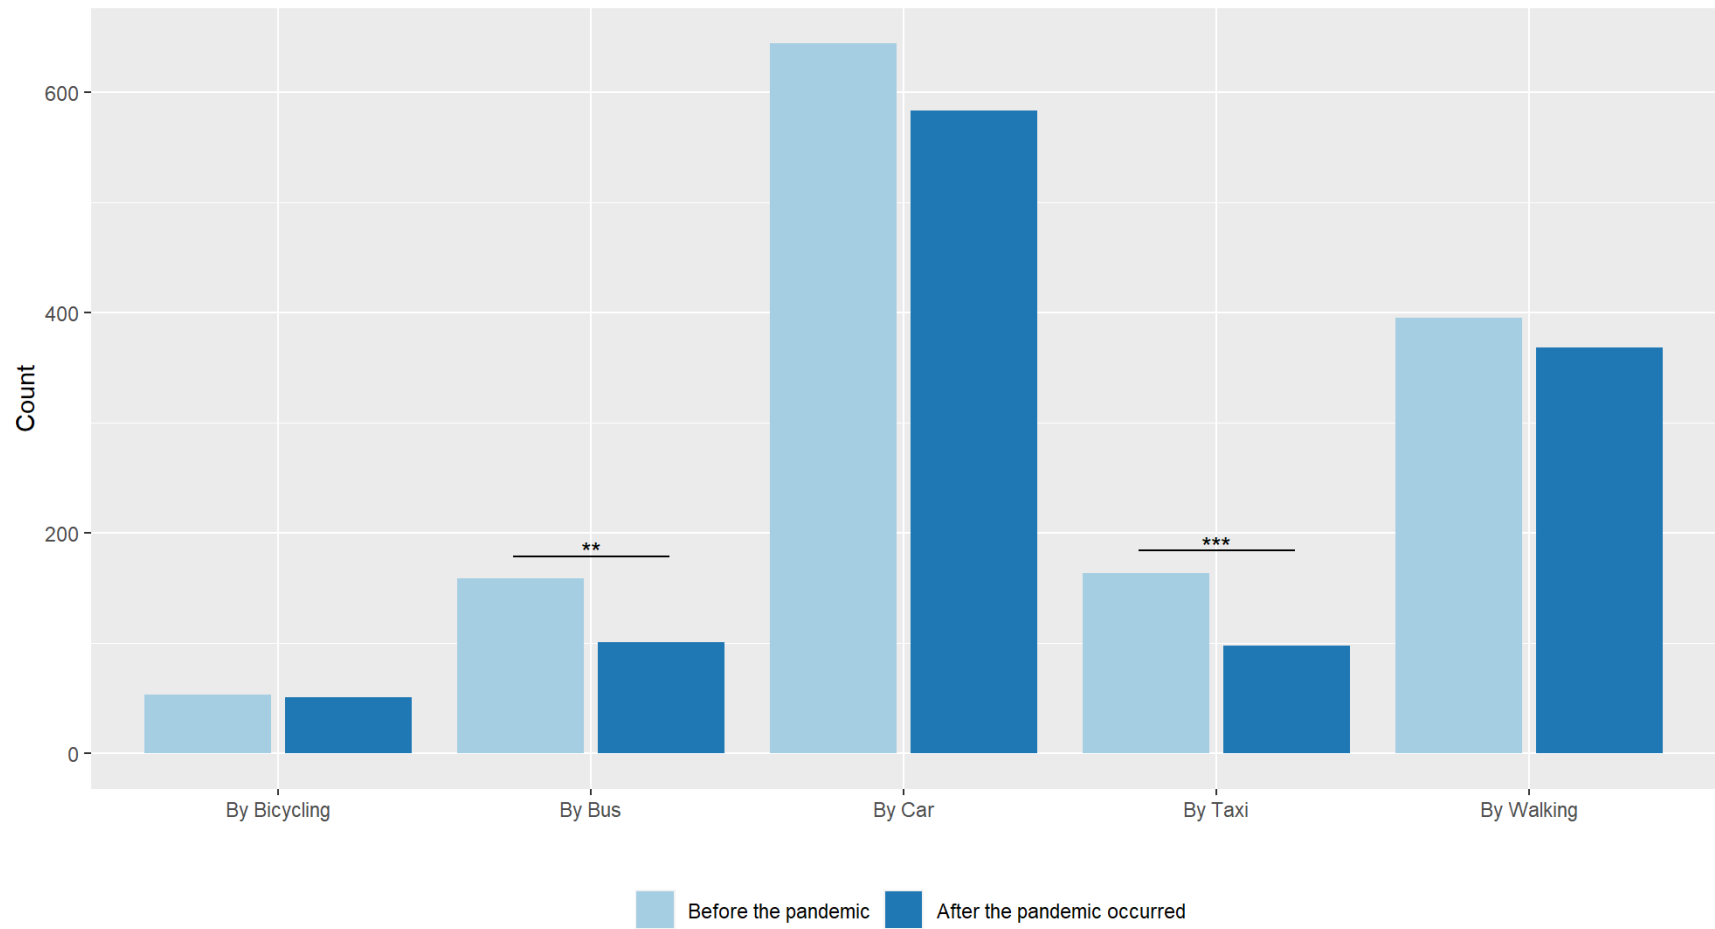

How far do respondents travel to natural areas?

|                     | Under 0.5 km | 0.5 to 1 km | 1 to 2 km | 2 to 4 km | Over 4 km |
|---------------------|--------------|-------------|-----------|-----------|-----------|
| Before the pandemic | 173          | 185         | 225       | 216       | 359       |
| After the pandemic  | 135          | 170         | 195       | 175       | 298       |
| X-squared           | 4.69         | 0.634       | 2.14      | 4.3       | 5.66      |
| p-value             | 0.0304       | 0.426       | 0.143     | 0.0381    | 0.0173    |
| Corrected p-value   | 0.121        | 0.426       | 0.286     | 0.121     | 0.0866    |

## Have respondents changed the activities they do in natural areas?

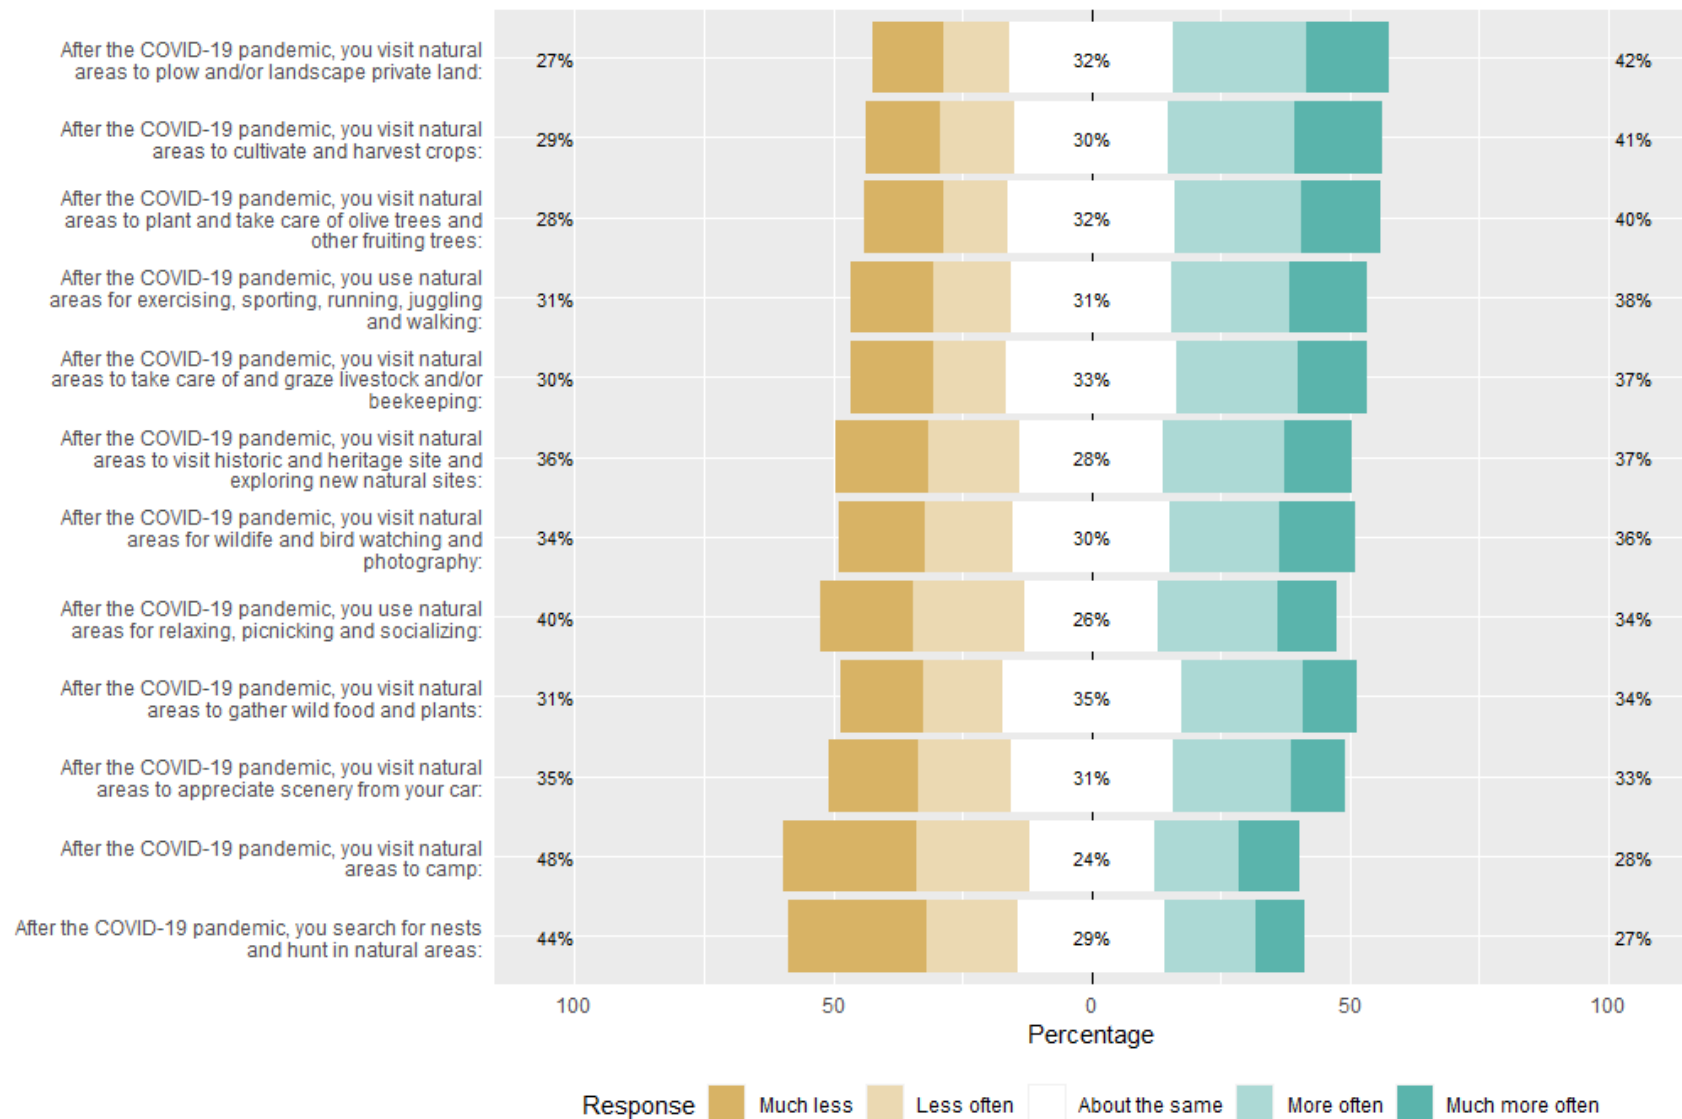

|                    | Bird watching<br>and<br>Photography | Camping | Cultivation | Exercise | Gathering | Harvesting | Historic<br>Sites | Landscapin<br>g | Livestock | Orchards | Relaxing | Scenery |
|--------------------|-------------------------------------|---------|-------------|----------|-----------|------------|-------------------|-----------------|-----------|----------|----------|---------|
| Much less          | 95                                  | 74      | 63          | 110      | 81        | 46         | 116               | 57              | 32        | 79       | 160      | 123     |
| Less often         | 98                                  | 62      | 64          | 103      | 77        | 30         | 116               | 52              | 28        | 65       | 193      | 124     |
| About the<br>same  | 175                                 | 69      | 131         | 212      | 175       | 49         | 180               | 131             | 66        | 166      | 230      | 220     |
| More often         | 121                                 | 47      | 108         | 156      | 119       | 30         | 152               | 106             | 47        | 126      | 206      | 160     |
| Much more<br>often | 85                                  | 34      | 74          | 102      | 53        | 16         | 86                | 65              | 27        | 80       | 101      | 74      |

## Do respondents do activities more or less often after the pandemic?

Do respondents perform activities in natural areas less or more often after the Covid19 pandemic?

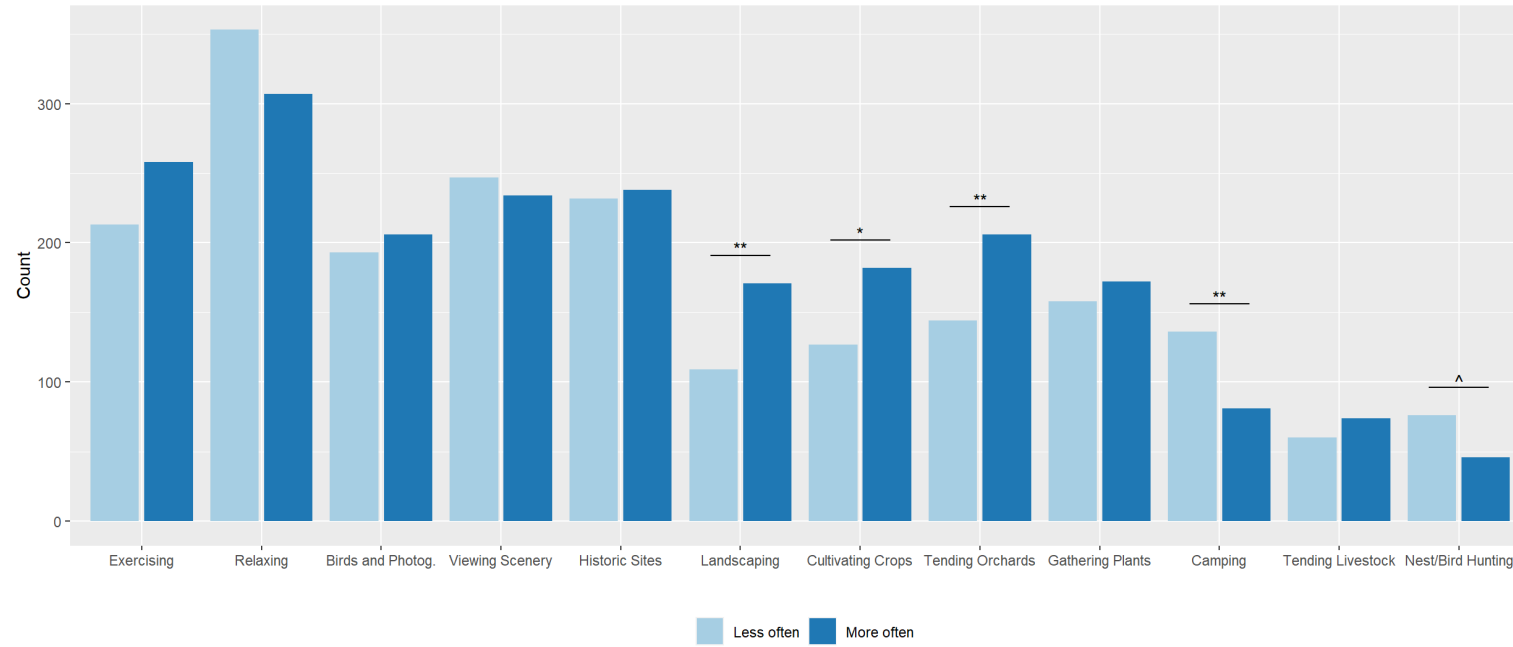

## MARITAL STATUS:

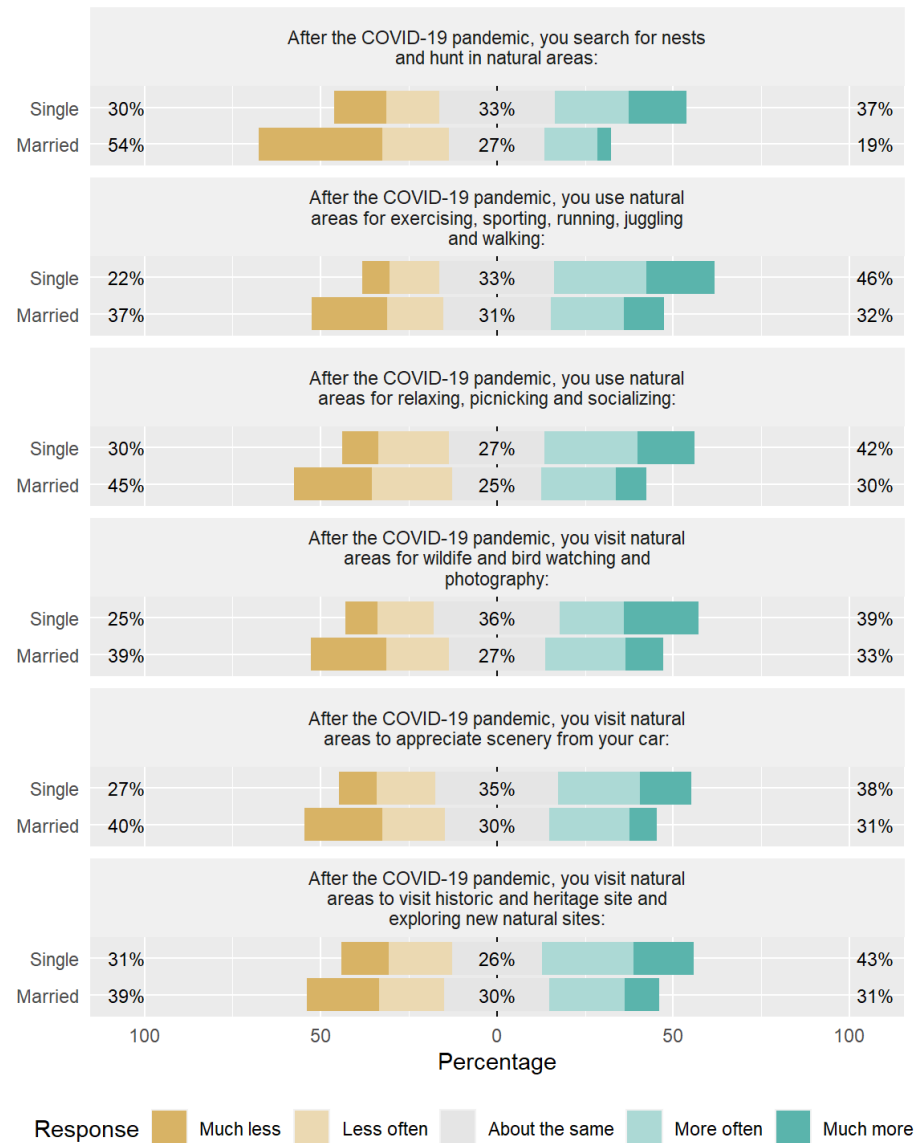

## HOUSING

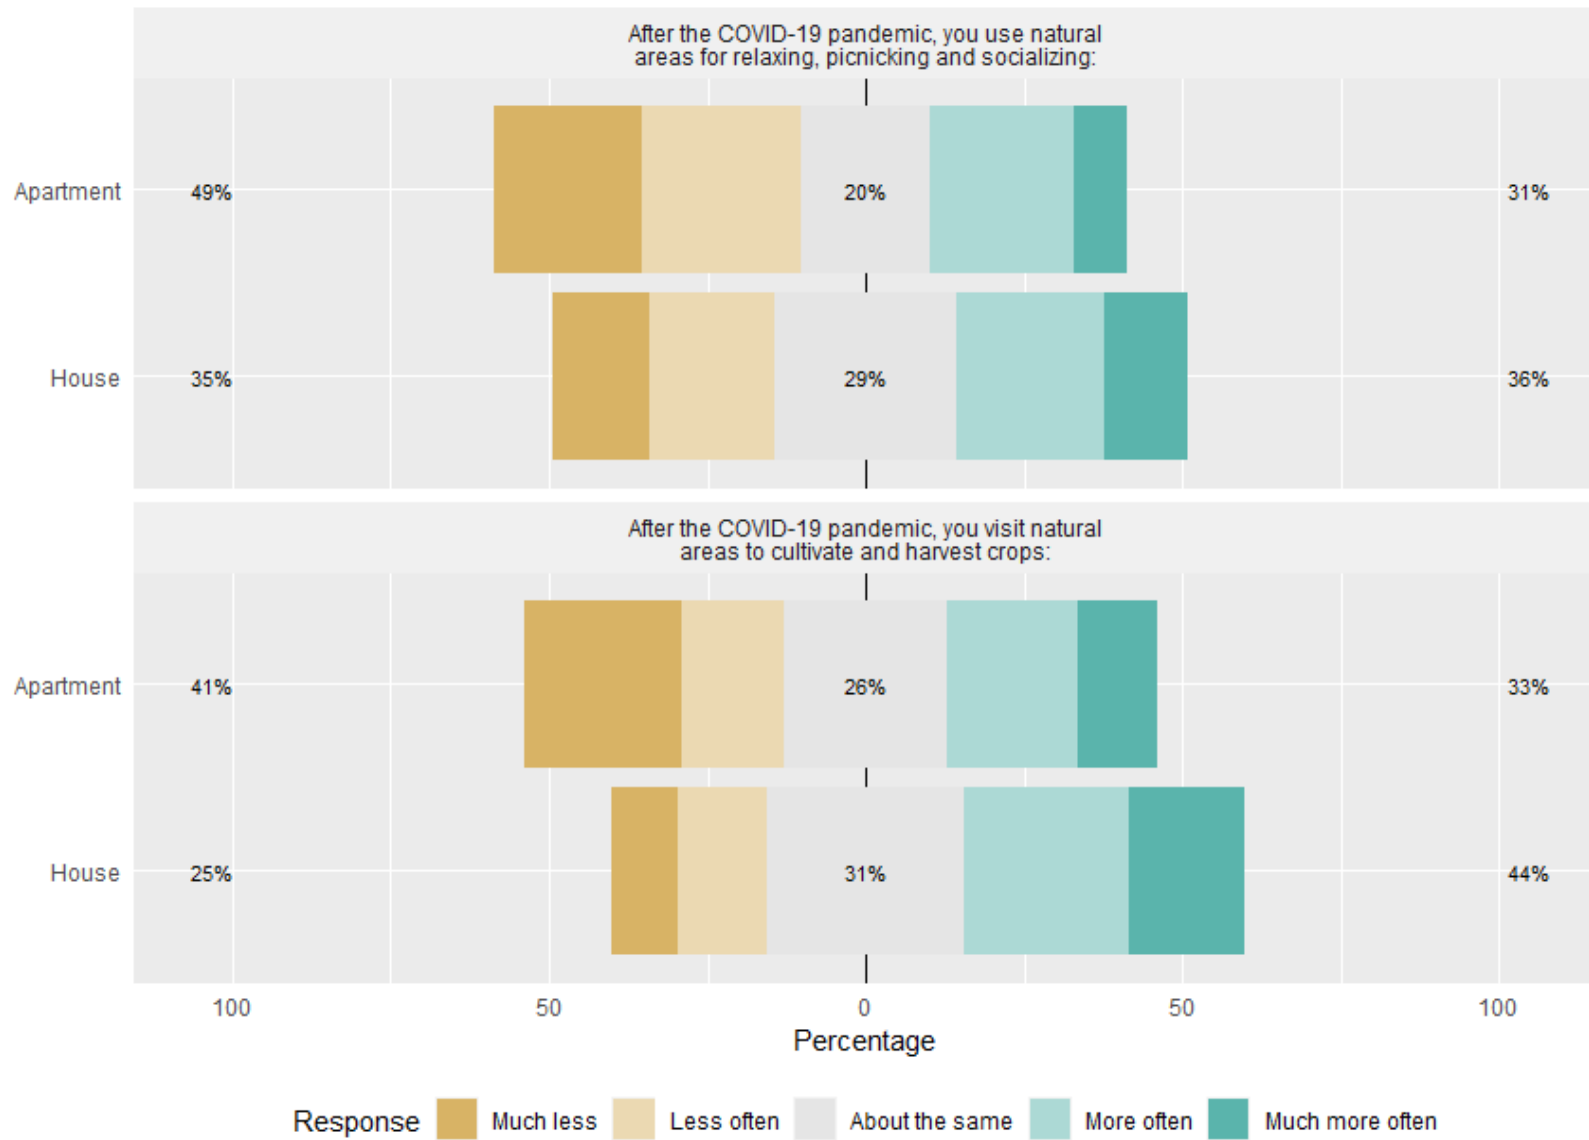

## TOWN TYPE

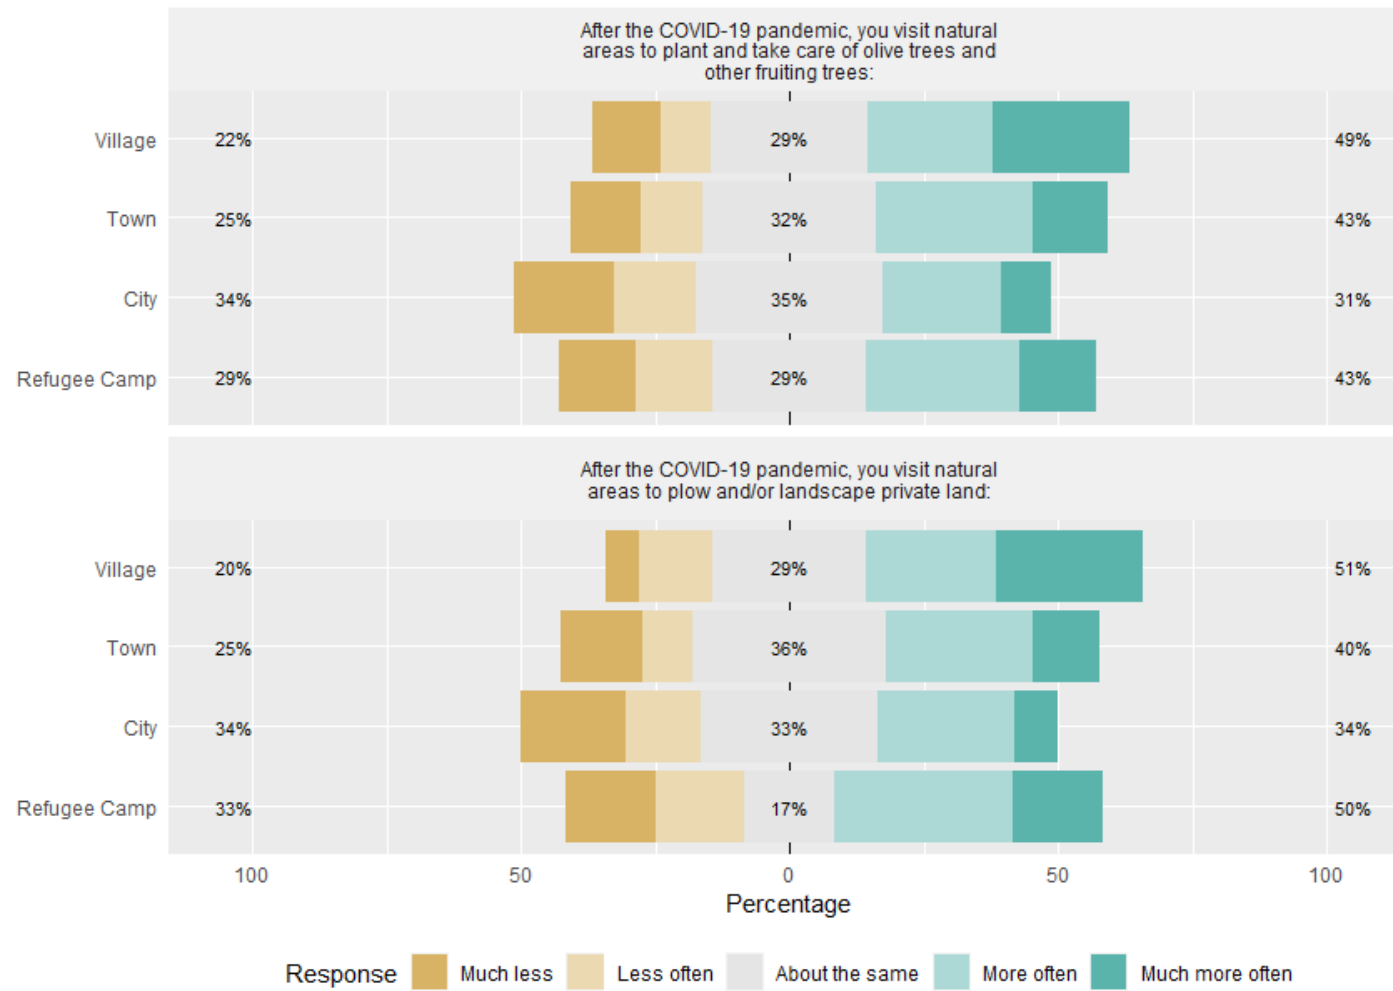

Plant and take care of olive trees and other fruiting trees:

|         | City | Town  | Village  |
|---------|------|-------|----------|
| City    | NA   | 0.542 | 0.000113 |
| Town    | NA   | NA    | 0.0225   |
| Village | NA   | NA    | NA       |

Plow or landscape private land:

|         | City | Town  | Village |
|---------|------|-------|---------|
| City    | NA   | 0.381 | 0.00162 |
| Town    | NA   | NA    | 0.381   |
| Village | NA   | NA    | NA      |

## EDUCATION

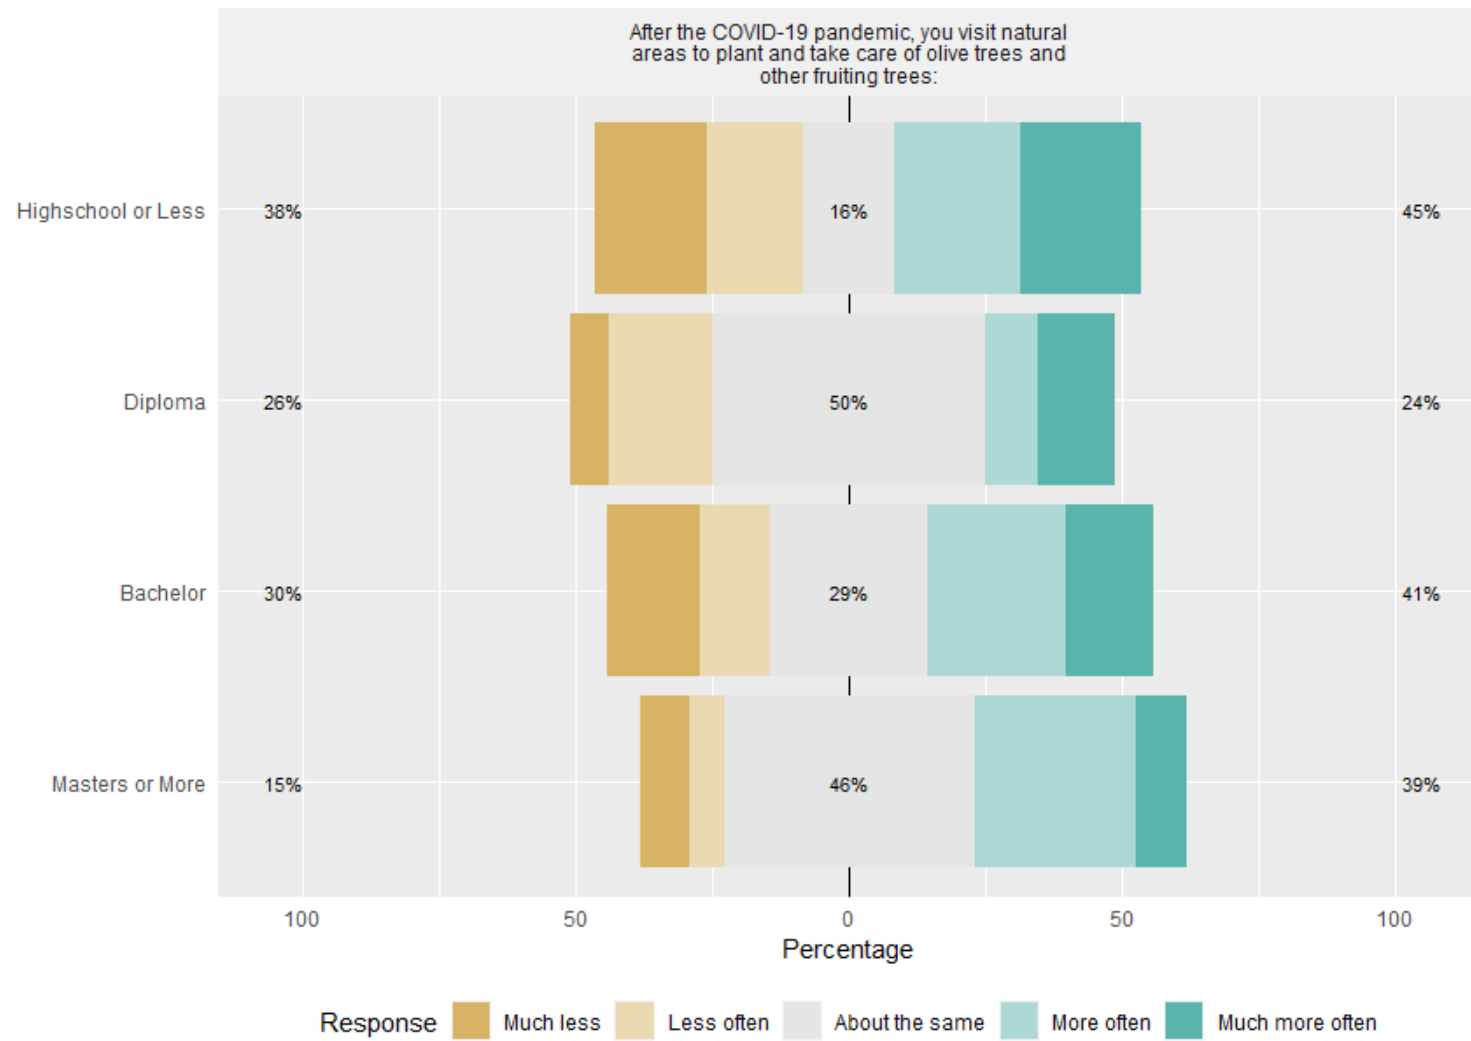

|                    | Highschool or Less | Diploma | Bachelor | Masters or More |
|--------------------|--------------------|---------|----------|-----------------|
| Highschool or Less | NA                 | 0.00913 | 0.178    | 0.000281        |
| Diploma            | NA                 | NA      | 0.0441   | 0.0555          |
| Bachelor           | NA                 | NA      | NA       | 0.0172          |
| Masters or More    | NA                 | NA      | NA       | NA              |

## AFTER COVID INCOME

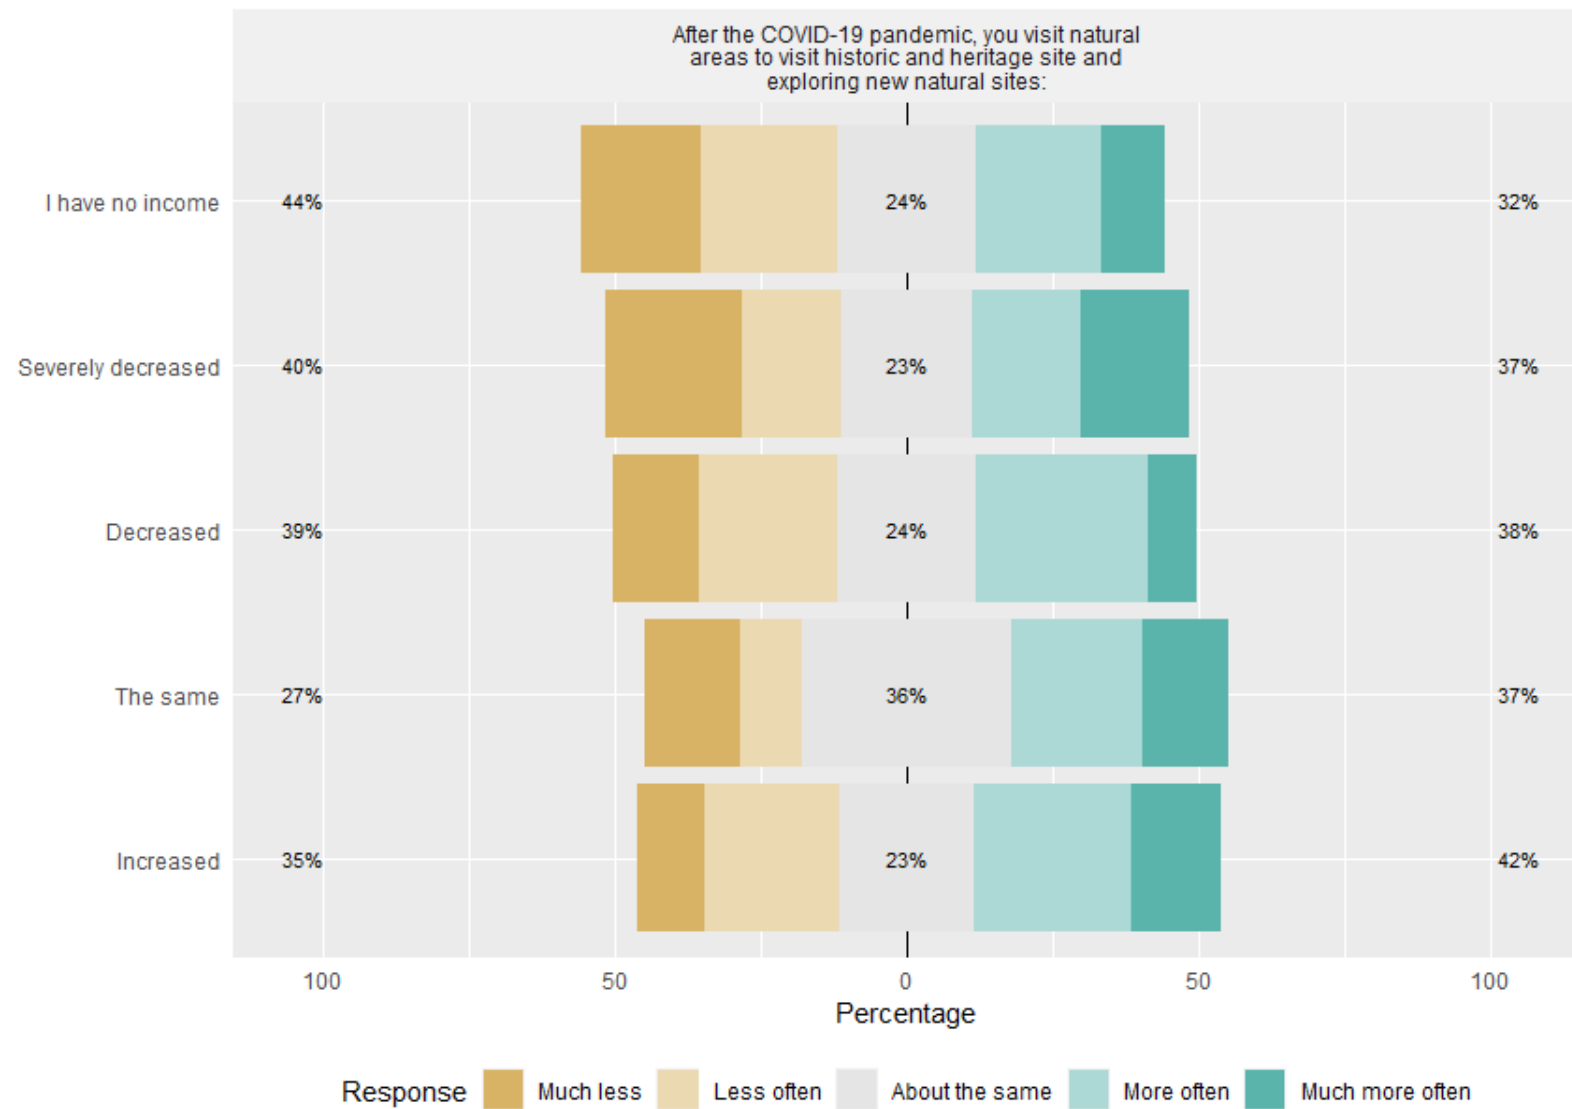

|                    | I have no income | Severely decreased | Decreased | The same | Increased |
|--------------------|------------------|--------------------|-----------|----------|-----------|
| I have no income   | NA               | 1                  | 1         | 0.0275   | 1         |
| Severely decreased | NA               | NA                 | 0.155     | 0.241    | 1         |
| Decreased          | NA               | NA                 | NA        | 0.0177   | 1         |
| The same           | NA               | NA                 | NA        | NA       | 1         |
| Increased          | NA               | NA                 | NA        | NA       | NA        |
