# Supplementary material for: COVID-19 Changed Human-Nature Interactions across Green Space Types: Evidence of Change in Multiple Types of Activities from the West Bank, Palestine
Source: MDPI journal article supplement (doi:10.3390/su132413831), 2021-12-14
Supplement: s1 [file s1 › SupplementalInformation4_Tests.xlsx]

## Sheet: Garden Chi-Squared Categ.
Demographic Variable		Gender	Marital Status	Age	Housing	Town Type	Governorate	Employment	Work Location	Education	Before Income	After Income
Relaxing	X-squared	2.16686	10.8558	18.7674	2.63551	5.97196	38.7386	43.2332	0.390465	26.163	38.6922	8.21992
	p-value	0.705101	0.0282336	0.280908	0.620547	0.650373	0.526993	0.668193	0.98325	0.0101779	0.0294099	0.767717
	corrected p-val	1	0.282336	1	1	1	1	1	1	0.111957	0.282336	1
Exercise	X-squared	1.68554	7.15436	16.5702	2.61054	2.81708	32.866	69.4911	2.89002	21.4956	15.285	8.88816
	p-value	0.793343	0.127952	0.413924	0.624957	0.945307	0.780793	0.022885	0.576396	0.0435774	0.912141	0.712453
	corrected p-val	1	1	1	1	1	1	0.251735	1	0.435774	1	1
Birdwatching & Photography	X-squared	4.11657	3.86882	12.3698	0.554584	6.74777	44.8143	49.4288	7.58688	16.2601	22.9021	7.97865
	p-value	0.390459	0.42405	0.718159	0.967974	0.564075	0.276936	0.415921	0.107939	0.17961	0.293626	0.786797
	corrected p-val	1	1	1	1	1	1	1	1	1	1	1
Gardening	X-squared	0.487679	2.98997	10.0288	3.99587	12.8936	49.6627	55.1369	7.27444	23.9093	27.8372	14.6576
	p-value	0.974689	0.559505	0.86512	0.406564	0.115562	0.140722	0.222897	0.122077	0.0209262	0.266966	0.260697
	corrected p-val	1	1	1	1	1	1	1	1	0.230188	1	1
Cultivating Ornamentals	X-squared	10.1756	2.741	12.6285	5.39021	13.5345	29.5486	59.2703	1.39901	24.3769	28.7973	11.5218
	p-value	0.0375716	0.60206	0.699704	0.24955	0.0947344	0.88742	0.127616	0.844367	0.0180675	0.227853	0.484805
	corrected p-val	0.375716	1	1	1	0.852609	1	1	1	0.198743	1	1
Tending Orchards	X-squared	0.404361	9.441	24.2239	5.66564	8.80094	33.8809	64.4659	NA	30.8631	29.139	8.87386
	p-value	0.982118	0.0509738	0.0847273	0.225548	0.359366	0.741149	0.0563818	NA	0.00206696	0.0850574	0.713665
	corrected p-val	1	0.458764	0.593091	1	1	1	0.458764	NA	0.0206696	0.593091	1
Landscaping	X-squared	3.44902	1.4398	20.5271	9.8017	5.96848	49.2342	50.9334	6.27941	27.466	22.9417	10.2603
	p-value	0.485672	0.837249	0.197414	0.0439038	0.650763	0.150219	0.35895	0.179231	0.00661732	0.523242	0.59314
	corrected p-val	1	1	1	0.439038	1	1	1	1	0.0727905	1	1
Bird Nest Harvesting & Hunting	X-squared	0.109637	2.49614	28.7363	NA	2.68193	51.5069	38.2181	NA	10.6579	22.2554	17.7703
	p-value	0.998551	0.645328	0.0257759	NA	0.61238	0.0452956	0.550673	NA	0.558439	0.564027	0.337519
	corrected p-val	1	1	0.231983	NA	1	0.362365	1	NA	1	1	1
Livestock	X-squared	4.38618	3.21073	25.5467	1.47433	11.61	34.8956	67.5194	NA	11.3198	31.991	19.7114
	p-value	0.356257	0.523199	0.181311	0.831179	0.16947	0.698993	0.033003	NA	0.50173	0.127217	0.0727469
	corrected p-val	1	1	1	1	1	1	0.33003	NA	1	1	0.654722

## Sheet: Garden Chi-Squared 5 Min
	Gender	Marital Status	Age	Housing	Town Type	Governorate	Employment	Work Location	Education	Before Income	After Income
afterGardensRelaxing_CHI	2.16686	10.8558	18.7674	2.63551	5.97196	24.448	17.8576	NA	21.2409	19.9586	8.21992
afterGardensRelaxing_PVAL	0.705101	0.0282336	0.280908	0.620547	0.650373	0.657683	0.596789	NA	0.00653427	0.0678722	0.767717
afterGardensRelaxing_CORPVAL	1	0.254103	1	1	1	1	1	NA	0.0653427	0.542978	1
afterGardensExercise_CHI	1.68554	7.15436	16.5702	2.61054	2.81708	14.4323	35.5683	NA	25.0363	11.4763	8.88816
afterGardensExercise_PVAL	0.793343	0.127952	0.413924	0.624957	0.945307	0.80792	0.0604076	NA	0.0146517	0.779174	0.712453
afterGardensExercise_CORPVAL	1	1	1	1	1	1	0.543668	NA	0.146517	1	1
afterGardensBirdPhotography_CHI	4.11657	3.86882	11.0017	0.554584	6.74777	15.7766	11.03	7.58688	7.16236	9.41143	6.49628
afterGardensBirdPhotography_PVAL	0.390459	0.42405	0.528773	0.967974	0.564075	0.0456919	0.526349	0.107939	0.127553	0.308785	0.591821
afterGardensBirdPhotography_CORPVAL	1	1	1	1	1	0.502611	1	1	1	1	1
afterGardensGardening_CHI	0.487679	2.98997	10.0288	NA	12.8936	NA	12.3754	NA	21.8548	16.9493	14.6576
afterGardensGardening_PVAL	0.974689	0.559505	0.86512	NA	0.115562	NA	0.416022	NA	0.0391796	0.151513	0.260697
afterGardensGardening_CORPVAL	1	1	1	NA	0.808933	NA	1	NA	0.313437	0.90908	1
afterGardensOrnamentals_CHI	10.1756	2.741	12.6285	5.39021	13.5345	6.99139	4.63861	NA	7.81865	14.8946	11.5218
afterGardensOrnamentals_PVAL	0.0375716	0.60206	0.699704	0.24955	0.0947344	0.858182	0.795411	NA	0.0984518	0.247253	0.484805
afterGardensOrnamentals_CORPVAL	0.375716	1	1	1	0.852609	1	1	NA	0.852609	1	1
afterGardensOrchard_CHI	0.404361	9.441	35.2275	5.66564	8.80094	4.62728	8.98832	NA	25.9069	12.4396	8.87386
afterGardensOrchard_PVAL	0.982118	0.0509738	0.0189255	0.225548	0.359366	0.327721	0.061392	NA	0.00108954	0.132643	0.713665
afterGardensOrchard_CORPVAL	1	0.40779	0.17033	1	1	1	0.429744	NA	0.0108954	0.795857	1
afterGardensLandscaping_CHI	3.44902	1.4398	10.814	NA	5.96848	18.3518	NA	NA	NA	9.52106	14.7387
afterGardensLandscaping_PVAL	0.485672	0.837249	0.21246	NA	0.650763	0.105419	NA	NA	NA	0.300262	0.256038
afterGardensLandscaping_CORPVAL	1	1	1	NA	1	0.737931	NA	NA	NA	1	1
afterGardensHarvesting_CHI	0.109637	NA	NA	NA	NA	NA	NA	NA	NA	NA	3.7037
afterGardensHarvesting_PVAL	0.998551	NA	NA	NA	NA	NA	NA	NA	NA	NA	0.447588
afterGardensHarvesting_CORPVAL	0.998551	NA	NA	NA	NA	NA	NA	NA	NA	NA	0.895175
afterGardensLivestock_CHI	4.38618	3.21073	12.6775	NA	NA	NA	NA	NA	NA	NA	NA
afterGardensLivestock_PVAL	0.356257	0.523199	0.123437	NA	NA	NA	NA	NA	NA	NA	NA
afterGardensLivestock_CORPVAL	0.712515	0.712515	0.37031	NA	NA	NA	NA	NA	NA	NA	NA

## Sheet: Greenspace Chi-Squared No Min
demographicVariable	Gender	Marital Status	Age	Housing	Town Type	Governorate	Employment	Work Location	Education	Before Income	After Income
afterGreenspaceExercise_CHI	4.89871	16.2866	24.0018	7.23281	28.2386	51.1558	64.1547	7.27829	26.2523	15.9567	12.2096
afterGreenspaceExercise_PVAL	0.297849	0.0384564	0.242313	0.124085	0.00510414	0.111199	0.0594127	0.121893	0.0505798	0.889633	0.908672
afterGreenspaceExercise_CORPVAL	0.969252	0.384564	0.969252	0.778393	0.0561455	0.778393	0.475302	0.778393	0.455218	1	1
afterGreenspaceRelaxing_CHI	4.75028	27.3239	38.0949	10.1047	13.3481	59.0608	55.7697	8.45181	27.1123	20.5748	27.0365
afterGreenspaceRelaxing_PVAL	0.313893	0.000621456	0.00862201	0.0387012	0.344257	0.0264514	0.2058	0.0763616	0.0402515	0.663662	0.134241
afterGreenspaceRelaxing_CORPVAL	0.941678	0.00683601	0.0862201	0.30961	0.941678	0.238063	0.823202	0.458169	0.30961	0.941678	0.671207
afterGreenspaceBirdPhotography_CHI	0.874113	20.7862	23.2464	9.89949	24.345	58.0186	76.7293	6.31004	25.3315	18.5544	14.6513
afterGreenspaceBirdPhotography_PVAL	0.928245	0.00773745	0.27686	0.0421553	0.0182506	0.032513	0.00526553	0.17716	0.0641904	0.775316	0.796002
afterGreenspaceBirdPhotography_CORPVAL	1	0.0773745	1	0.295087	0.164255	0.260104	0.0579209	0.885799	0.385143	1	1
afterGreenspaceHarvesting_CHI	3.7543	20.5646	14.934	1.65211	20.2838	34.6631	63.9317	3.13889	18.1753	32.095	25.183
afterGreenspaceHarvesting_PVAL	0.440278	0.00839841	0.780172	0.799398	0.0619047	0.532132	0.0616676	0.534858	0.313734	0.124653	0.19452
afterGreenspaceHarvesting_CORPVAL	1	0.0923825	1	1	0.616676	1	0.616676	1	1	0.997225	1

## Sheet: Urban Park Chi-Squared Categ.
Demographic Variable		Gender	Marital Status	Age	Housing	Town Type	Governorate	Employment	Work Location	Education	Before Income	After Income
Exercise	X-squared	4.89871	7.92265	18.7764	7.23281	18.1011	51.1558	64.1547	7.27829	23.6672	15.9567	8.5998
	p-value	0.297849	0.0944532	0.280429	0.124085	0.0204808	0.111199	0.0594127	0.121893	0.022567	0.889633	0.736679
	corrected p-val	1	0.755626	1	0.778393	0.225289	0.778393	0.534715	0.778393	0.22567	1	1
Relaxing	X-squared	4.75028	25.8387	31.694	10.1047	9.8919	59.0608	55.7697	8.45181	16.1896	20.5748	18.4027
	p-value	0.313893	3.41048e-05	0.0109573	0.0387012	0.272695	0.0264515	0.2058	0.0763616	0.182706	0.663662	0.30085
	corrected p-val	1	0.000375153	0.109573	0.30961	1	0.238063	1	0.534531	1	1	1
Birdwatching & Photography	X-squared	0.874113	19.838	19.7253	9.89949	16.6383	58.0186	76.7293	6.31004	21.9687	18.5544	6.87956
	p-value	0.928245	0.000537546	0.232848	0.0421553	0.0341034	0.032513	0.00526553	0.17716	0.0378717	0.775316	0.865469
	corrected p-val	1	0.005913	0.931393	0.292617	0.292617	0.292617	0.0526553	0.885799	0.292617	1	1
Bird Nest Harvesting & Hunting	X-squared	3.7543	13.5914	14.934	1.65211	15.75	34.6631	63.9317	NA	14.4304	32.095	19.2773
	p-value	0.440278	0.00871993	0.780172	0.799398	0.0461018	0.532132	0.0616676	NA	0.274074	0.124653	0.0820525
	corrected p-val	1	0.0871993	1	1	0.414916	1	0.493341	NA	1	0.747918	0.574367

## Sheet: Greenspace Chi-Squared 5 Min
	Work Location	Town Type	Marital Status	Housing	Governorate	Gender	Employment	Education	Before Income	Age	After Income
afterGreenspaceExercise_CHI	7.27829	18.1011	7.92265	7.23281	36.0439	4.89871	20.1171	9.05833	13.2363	18.7764	8.5998
afterGreenspaceExercise_PVAL	0.121893	0.0204808	0.0944532	0.124085	0.0543515	0.297849	0.450626	0.3374	0.867015	0.280429	0.736679
afterGreenspaceExercise_CORPVAL	0.975143	0.225289	0.850079	0.975143	0.543515	1	1	1	1	1	1
afterGreenspaceRelaxing_CHI	8.45181	9.8919	25.8387	10.1047	42.3674	4.75028	26.8276	16.4428	20.5748	17.945	11.3768
afterGreenspaceRelaxing_PVAL	0.0763616	0.272695	3.41048e-05	0.0387012	0.0400218	0.313893	0.140185	0.171786	0.663662	0.117371	0.496929
afterGreenspaceRelaxing_CORPVAL	0.610893	1	0.000375153	0.387012	0.387012	1	0.841112	0.858927	1	0.8216	1
afterGreenspaceBirdPhotography_CHI	6.31004	16.6383	19.838	9.89949	41.8441	0.874113	26.9865	20.2546	10.6145	16.8698	6.87956
afterGreenspaceBirdPhotography_PVAL	0.17716	0.0341034	0.000537546	0.0421553	0.0134333	0.928245	0.041633	0.0624197	0.832634	0.154561	0.865469
afterGreenspaceBirdPhotography_CORPVAL	0.772804	0.306931	0.005913	0.333064	0.134333	1	0.333064	0.374518	1	0.772804	1
afterGreenspaceHarvesting_CHI	NA	6.77617	13.5914	1.65211	NA	3.7543	NA	NA	4.96247	2.63492	NA
afterGreenspaceHarvesting_PVAL	NA	0.1482	0.00871993	0.799398	NA	0.440278	NA	NA	0.29117	0.62065	NA
afterGreenspaceHarvesting_CORPVAL	NA	0.740999	0.0523196	1	NA	1	NA	NA	1	1	NA

## Sheet: Natural Area Chi-Squared Categ.
Demographic Variables		Gender	Marital Status	Age	Housing	Town Type	Governorate	Employment	Work Location	Education	Before Income	After Income
Exercise	X-squared	5.59886	27.6682	23.9194	10.9693	13.1112	50.3086	41.8564	5.71451	12.6949	18.5872	25.859
	p-value	0.231175	1.4561e-05	0.09128	0.0269116	0.10808	0.0570535	0.721437	0.221508	0.391599	0.773631	0.0560443
	corrected p-val	1	0.000160171	0.63896	0.269116	0.648477	0.504399	1	1	1	1	0.504399
Relaxing	X-squared	2.06886	29.7616	22.5992	19.5439	16.8463	45.0516	56.1662	10.7537	24.2452	26.8756	13.0584
	p-value	0.723096	5.47296e-06	0.124876	0.000614327	0.155472	0.143286	0.195559	0.0294763	0.0188339	0.310285	0.668486
	corrected p-val	1	6.02026e-05	0.874131	0.00614327	0.874131	0.874131	0.874131	0.23581	0.169505	0.930855	1
Birdwatching & Photography	X-squared	4.32835	27.8586	20.928	7.63823	15.3698	55.1085	41.2419	4.61892	24.5719	22.6006	12.1772
	p-value	0.363389	1.33234e-05	0.181293	0.105766	0.0523416	0.0563357	0.744129	0.328678	0.0169869	0.308828	0.431552
	corrected p-val	1	0.000146557	1	0.740364	0.471075	0.471075	1	1	0.169869	1	1
Viewing Scenery	X-squared	3.48932	20.4581	20.111	3.5141	3.70173	42.5743	64.481	10.5202	12.1235	20.0973	13.4558
	p-value	0.479504	0.000405441	0.215262	0.475737	0.882982	0.209075	0.0562383	0.0325195	0.435813	0.69123	0.336799
	corrected p-val	1	0.00445985	1	1	1	1	0.506145	0.325195	1	1	1
Visiting Historic Sites	X-squared	3.79268	13.3637	10.7289	6.81977	11.8122	37.5941	45.0741	5.01845	15.403	20.1338	34.6199
	p-value	0.43479	0.00962871	0.825902	0.145725	0.159783	0.579096	0.593459	0.285409	0.220136	0.689142	0.0044783
	corrected p-val	1	0.0962872	1	1	1	1	1	1	1	1	0.0492612
Landscaping	X-squared	0.638641	4.314	14.6558	8.29926	29.8301	43.3009	50.7506	10.4532	13.1453	33.7194	15.5399
	p-value	0.958674	0.365175	0.549978	0.081211	0.0002265	0.332328	0.365675	0.0334473	0.358572	0.0897811	0.21323
	corrected p-val	1	1	1	0.730899	0.0024915	1	1	0.334473	1	0.730899	1
Cultivation	X-squared	4.0286	2.68975	13.2532	15.8813	20.9378	48.5244	56.045	3.197	21.5949	34.7189	17.6109
	p-value	0.402149	0.611009	0.654164	0.00318265	0.00731463	0.167002	0.198652	0.525415	0.042319	0.0726792	0.128026
	corrected p-val	1	1	1	0.0350092	0.0731463	1	1	1	0.380871	0.581434	0.896179
Tending Orchards	X-squared	1.0482	1.08157	7.44799	8.68605	23.3465	51.5801	36.6355	10.4304	38.2748	24.3643	16.5918
	p-value	0.902401	0.897185	0.96363	0.0694442	0.00294677	0.103773	0.884357	0.033769	0.000138455	0.22684	0.165609
	corrected p-val	1	1	1	0.555554	0.0294677	0.726413	1	0.303921	0.00152301	1	0.993652
Plant Gathering	X-squared	0.776181	5.28323	13.4134	5.36068	6.03036	50.1089	48.8047	5.26705	19.3043	15.0251	12.1575
	p-value	0.941612	0.259451	0.642322	0.25225	0.643831	0.131328	0.440505	0.260978	0.0814455	0.77497	0.433117
	corrected p-val	1	1	1	1	1	1	1	1	0.8959	1	1
Group Camping	X-squared	7.82164	6.55054	18.7334	8.525	1.40586	36.3648	36.8649	2.11148	6.38217	16.3057	12.3634
	p-value	0.0983348	0.161633	0.539208	0.074133	0.994163	0.634665	0.87881	0.715264	0.895606	0.876727	0.41695
	corrected p-val	0.983348	1	1	0.815463	1	1	1	1	1	1	1
Livestock Tending	X-squared	1.53799	7.71675	15.9304	6.04668	14.2813	50.444	50.3047	NA	7.75251	27.2548	4.48757
	p-value	0.819891	0.102523	0.720933	0.195689	0.0747228	0.124597	0.382318	NA	0.458011	0.292719	0.972948
	corrected p-val	1	0.922705	1	1	0.747228	0.99678	1	NA	1	1	1
Bird Nest Harvesting & Hunting	X-squared	0.440379	14.5401	16.2705	4.98728	1.79469	48.6573	39.7355	NA	12.101	18.1592	11.6721
	p-value	0.97904	0.00575648	0.699707	0.288605	0.986672	0.0774589	0.654849	NA	0.437603	0.795218	0.472358
	corrected p-val	1	0.0575648	1	1	1	0.69713	1	NA	1	1	1

## Sheet: Natural Space Chi-Squared 5 Min
	Gender	Marital Status	Age	Housing	Town Type	Governorate	Employment	Work Location	Education	Before Income	After Income
afterNaturalExercise_CHI	5.59886	27.6682	23.9194	10.9693	13.1112	42.2801	28.1179	5.71451	11.4678	12.0642	19.9044
afterNaturalExercise_PVAL	0.231175	1.4561e-05	0.09128	0.0269116	0.10808	0.040794	0.2551	0.221508	0.48931	0.91385	0.0689152
afterNaturalExercise_CORPVAL	1	0.000160171	0.63896	0.269116	0.648477	0.367146	1	1	1	1	0.551322
afterNaturalRelaxing_CHI	2.06886	29.7616	22.5992	19.5439	13.2267	45.0516	37.8462	10.7537	22.9229	19.2999	4.70507
afterNaturalRelaxing_PVAL	0.723096	5.47296e-06	0.124876	0.000614327	0.104284	0.143286	0.0359508	0.0294763	0.0283875	0.502416	0.967112
afterNaturalRelaxing_CORPVAL	1	6.02026e-05	0.625706	0.00614327	0.625706	0.625706	0.255488	0.255488	0.255488	1	1
afterNaturalBirdPhotography_CHI	4.32835	27.8586	20.928	7.63823	19.8801	20.7124	24.6283	4.61892	24.861	24.306	12.1772
afterNaturalBirdPhotography_PVAL	0.363389	1.33234e-05	0.181293	0.105766	0.0693888	0.414228	0.426179	0.328678	0.0154956	0.444217	0.431552
afterNaturalBirdPhotography_CORPVAL	1	0.000146557	1	0.84613	0.624499	1	1	1	0.154956	1	1
afterNaturalScenery_CHI	3.48932	20.4581	20.111	3.5141	3.70173	38.3139	32.1748	10.5202	11.0208	20.0973	13.4558
afterNaturalScenery_PVAL	0.479504	0.000405441	0.215262	0.475737	0.882982	0.092606	0.0414711	0.0325195	0.527136	0.69123	0.336799
afterNaturalScenery_CORPVAL	1	0.00445985	1	1	1	0.740848	0.37324	0.325195	1	1	1
afterNaturalHistoric_CHI	3.79268	13.3637	10.7289	6.81977	11.8122	28.1377	27.0985	5.01845	15.0987	9.0121	33.1596
afterNaturalHistoric_PVAL	0.43479	0.00962872	0.825902	0.145725	0.159783	0.662531	0.51289	0.285409	0.236085	0.982767	0.000914014
afterNaturalHistoric_CORPVAL	1	0.0962872	1	1	1	1	1	1	1	1	0.0100541
afterNaturalLandscaping_CHI	0.638641	4.314	14.6558	8.29926	29.8301	18.1033	17.7574	NA	13.0008	16.0537	15.5399
afterNaturalLandscaping_PVAL	0.958674	0.365175	0.549978	0.081211	0.0002265	0.317883	0.338294	NA	0.368985	0.449222	0.21323
afterNaturalLandscaping_CORPVAL	1	1	1	0.730899	0.002265	1	1	NA	1	1	1
afterNaturalCultivation_CHI	4.0286	2.68975	13.2532	15.8813	20.9378	12.7741	22.5667	3.197	22.4247	23.3764	17.6109
afterNaturalCultivation_PVAL	0.402149	0.611009	0.654164	0.00318265	0.00731463	0.689198	0.310568	0.525415	0.0330265	0.104038	0.128026
afterNaturalCultivation_CORPVAL	1	1	1	0.0350092	0.0731463	1	1	1	0.297238	0.832301	0.896179
afterNaturalOrchard_CHI	1.0482	1.08157	7.44799	8.68605	23.3465	31.5181	17.5872	10.4304	33.7638	20.6024	16.5918
afterNaturalOrchard_PVAL	0.902401	0.897185	0.96363	0.0694442	0.00294677	0.294563	0.822561	0.033769	0.000734857	0.194304	0.165609
afterNaturalOrchard_CORPVAL	1	1	1	0.555554	0.0294677	1	1	0.303921	0.00808343	1	1
afterNaturalGathering_CHI	0.776181	5.28323	13.4134	5.36068	6.03036	9.96125	11.1818	5.26705	17.3134	10.9481	12.1575
afterNaturalGathering_PVAL	0.941612	0.259451	0.642322	0.25225	0.643831	0.868644	0.79813	0.260977	0.138185	0.812675	0.433117
afterNaturalGathering_CORPVAL	1	1	1	1	1	1	1	1	1	1	1
afterNaturalCamping_CHI	7.82164	6.55054	5.4981	8.525	1.40586	14.1961	14.1204	2.11148	2.67645	4.26425	12.3634
afterNaturalCamping_PVAL	0.0983348	0.161633	0.70325	0.074133	0.994163	0.820414	0.589744	0.715264	0.952995	0.978182	0.41695
afterNaturalCamping_CORPVAL	0.983348	1	1	0.815463	1	1	1	1	1	1	1
afterNaturalLivestock_CHI	1.53799	7.71675	5.58934	6.04668	14.2813	18.9906	2.06331	NA	2.09266	1.06383	4.48757
afterNaturalLivestock_PVAL	0.819891	0.102523	0.693122	0.195689	0.0747228	0.088756	0.724116	NA	0.71872	0.899968	0.972948
afterNaturalLivestock_CORPVAL	1	0.820182	1	1	0.747228	0.798804	1	NA	1	1	1
afterNaturalHarvesting_CHI	0.440379	14.5401	9.38075	4.98728	1.79469	NA	3.06741	NA	NA	9.7924	2.16219
afterNaturalHarvesting_PVAL	0.97904	0.00575648	0.311201	0.288605	0.986672	NA	0.546609	NA	NA	0.279901	0.705957
afterNaturalHarvesting_CORPVAL	1	0.0460518	1	1	1	NA	1	NA	NA	1	1
